## 1 **Tissue specific auxin biosynthesis regulates leaf vein patterning**

2 Irina Kneuper<sup>1</sup>, William Teale<sup>1</sup>, Jonathan Edward Dawson<sup>2</sup>, Ryuji Tsugeki<sup>3</sup>, Klaus Palme<sup>1,4,5,6</sup>, Eleni  
3 Katifori<sup>2,7</sup> & Franck Anicet Ditengou<sup>1</sup>

4 <sup>1</sup>Institute of Biology II, Faculty of Biology, Albert-Ludwigs-University of Freiburg, Schänzlestrasse 1,  
5 79104 Freiburg, Germany.

6 <sup>2</sup>Physics of Biological Organization, Max Planck Institute for Dynamics and Self-Organization, Am  
7 Fassberg 17, 37077 Göttingen, Germany.

8 <sup>3</sup>Department of Botany, Graduate School of Science, Kyoto University, Sakyo-ku, Kyoto 606-8502  
9 Japan

10 <sup>4</sup>Center for Biological Systems Analysis, Albert-Ludwigs-University of Freiburg, Habsburgerstrasse 49,  
11 79104 Freiburg, Germany.

12 <sup>5</sup>Freiburg Institute for Advanced Sciences (FRIAS), Albert-Ludwigs-University of Freiburg,  
13 Albertstrasse 19, 79104 Freiburg, Germany.

14 <sup>6</sup>BIOSS Center for Biological Signalling Studies, Albert-Ludwigs-University of Freiburg,  
15 Schänzlestrasse 18, 79104 Freiburg, Germany.

16 <sup>7</sup>Department of Physics and Astronomy, University of Pennsylvania, PA, 19104, USA.

17

## 18 **Corresponding Authors**

19 Franck A. Ditengou ([franck.ditengou@biologie.uni-freiburg.de](mailto:franck.ditengou@biologie.uni-freiburg.de)). Twitter: @FDitengou

20 Klaus Palme ([klaus.palme@biologie.uni-freiburg.de](mailto:klaus.palme@biologie.uni-freiburg.de)).

## 21 **Lead Contact**

22 Franck A. Ditengou ([franck.ditengou@biologie.uni-freiburg.de](mailto:franck.ditengou@biologie.uni-freiburg.de))

23

## 24 **Highlights**

- 25 • Built spatially and temporally resolved auxin biosynthesis map in growing leaf primordium of  
26 Arabidopsis.
- 27 • Expression domains of auxin biosynthetic enzymes within primordia strongly correlated with leaf  
28 vein initiation.
- 29 • Results show that domains of auxin biosynthesis within primordia drive leaf vein initiation and  
30 patterning.

31

## 32 **Summary**

33 The plant hormone auxin (indole-3-acetic acid, IAA) has a profound influence over plant cell growth  
34 and differentiation. Current understanding of vein development in leaves is based on the canalization  
35 of auxin into self-reinforcing streams which determine the sites of vascular cell differentiation.  
36 However, the role of auxin biosynthesis during leaf development in the context of leaf vein patterning  
37 has not been much studied so far. Here we characterize the context specific importance of auxin  
38 biosynthesis, auxin transport and mechanical regulations in a growing leaf. We show that domains of  
39 auxin biosynthesis predict the positioning of vascular cells. In mutants that have reduced capacity in  
40 auxin biosynthesis, leaf vein formation is decreased. While exogenous application of auxin does not  
41 compensate the loss of vein formation in auxin biosynthesis mutants, inhibition of polar auxin  
42 transport does compensate the vein-less phenotype, suggesting that the site-specific accumulation  
43 of auxin, which is likely to be mainly caused by the local auxin biosynthesis, is important for leaf vein  
44 formation. Our computational model of midvein development brings forth the interplay of cell  
45 stiffness and auxin dependent cell division. We propose that local auxin biosynthesis has the integral  
46 role in leaf vascular development.

47

## 48 **Keywords**

49 Auxin, leaf, vein patterning, mathematical modelling

50 **Highlights and eTOC Blurb**

51 Using modelling and a spatiotemporal analysis of auxin biosynthesis and transport, Kneuper et al.  
52 show that tissue specific auxin biosynthesis defines places of vein initiation hence underlining the  
53 importance of auxin concentration in vein initiation.

54

55 **Introduction**

56 Vascular systems are continuous networks of cells which connect a wide range of tissues. In leaves,  
57 veins form characteristic patterns which support photosynthesis in the surrounding mesophyll cells.  
58 However, despite leaf venation patterning being important for the overall fitness of the plant (Blonder  
59 et al., 2011), the processes which guide vein placement are not well understood. In plants the eventual  
60 pattern of the vascular network is widely believed to be controlled by the phytohormone auxin (Bruck  
61 and Paolillo, 1984), via its canalization into self-reinforcing streams (Effendi et al., 2015; Sachs, 1969).  
62 Support for with-the-flux-based explanations of leaf vascular development followed the identification  
63 of PIN1: a long-predicted auxin efflux protein and the earliest marker of leaf vascular cell identity  
64 (Galweiler et al., 1998; Scarpella et al., 2006). The polar localization of PIN1 in leaf epidermal cells has  
65 offered a mechanism which focuses auxin to specific epidermal domains which correlate with the  
66 directions of future vein development (Scarpella *et al.* 2006).

67 Experimental studies on auxin canalization have been corroborated with theoretical models based on  
68 the auxin canalization hypothesis, that have shown how reinforcing fluxes in a fixed domain of leaf  
69 tissue can create channels of auxin that resemble the vein patterns observed in leaves (Rolland-Lagan  
70 and Prusinkiewicz, 2005). However, the robustness of canalization models is reduced when applied to  
71 a growing tissue (Feller et al., 2015; Lee et al., 2014). The canalization hypothesis states that the  
72 position of auxin sources in the leaf primordium is critical for vein formation. It has been proposed  
73 that these sources are derived from the focal points of epidermal auxin flux, from where auxin flows

74 in channels towards the base of the leaf (Scarpella et al., 2006). However, in addition to epidermis-  
75 derived auxin (Abley et al., 2016), auxin is also synthesized in the lamina of the growing primordium;  
76 an observation which has, to date, not been considered by any models. In support of a major role for  
77 auxin biosynthesis in vascular development in leaves, Cheng and colleagues observed progressively  
78 fewer and more discontinuous vascular strands when less auxin is synthesized in the primordium  
79 (Cheng et al., 2006), suggesting that local biosynthesis may lift auxin concentration above certain  
80 thresholds required for vascular tissues to form.

81 In this study, which combines a series of experiments with theory and assesses the role of auxin  
82 biosynthesis in vein initiation and patterning in the growing leaf, we find that leaf vein initiation is  
83 strongly correlated with the expression domains of auxin biosynthetic enzymes within primordia. We  
84 build an auxin-transport-independent model of vascular tissue development, and use it to identify cell  
85 expansion, auxin production rate, cellular auxin concentration and the auxin concentration-dependent  
86 cell growth of non-auxin producing cells as a robust, minimal set of parameters, for spontaneous  
87 organization of primordium cells into a midvein.

88

## 89 **Results**

90 Reducing a plant's capacity to synthesize auxin, either genetically or by the application of enzyme  
91 inhibitors, impairs the development of leaf vein networks (Nishimura et al., 2014; Stepanova et al.,  
92 2008). In mutants defective in auxin biosynthesis, leaves have fewer, more widely spaced veins which  
93 are often disorganized and discontinuous (Figures 1A and S1A-S1E, S1H). We therefore first wanted  
94 to ascertain whether auxin biosynthesis acts exclusively through increasing the overall amount of auxin  
95 available for transport-based patterning mechanisms. However, exogenous application of auxin cannot  
96 rescue aberrant vein development in *wei8-1tar2-1*, a mutant defective in auxin biosynthesis

97 (Stepanova et al., 2011) (Figure 1), suggesting that it is not simply the amount of auxin produced which  
98 is important, but that the site of auxin production is also important for vein formation.

99 Two families of enzymes act in series to catalyze the indole-3-pyruvic acid (IPA)-dependent production  
100 of IAA: tryptophan aminotransferases (TAA1/WEI8, TAR1 and TAR2) and YUCCA flavin  
101 monooxygenases (Mashiguchi et al., 2011; Stepanova et al., 2011; Zhao, 2012). Here, we focused on  
102 YUC1, YUC2, YUC4, YUC6, as they are the main YUCs for auxin biosynthesis in shoots, whereas the  
103 other YUCs (i.e. YUC3, YUC5, YUC7, YUC8, YUC9) are responsible for producing auxin in roots (Won et  
104 al., 2011; Zhao, 2012). In order to resolve spatial synthesis of auxin within the lamina of a growing leaf,  
105 we visualized the expression pattern of auxin biosynthetic genes and their correlation with pre-  
106 provascular cells in the leaf primordium. We built an auxin-biosynthesis map in Arabidopsis, at cellular  
107 resolution using well established standard techniques (imaging of GFP fusion proteins, promoter GUS  
108 fusions), which reflect faithfully the expression of auxin biosynthetic genes in leaf primordia over time.  
109 At between 2 and 5 days after germination (DAG), enzymes of YUCCA and TAA1 families showed highly  
110 localized expression patterns in which the future sites of vascular cells can be clearly seen (Figures 2;  
111 S2 and S3). Over this time period, expression domains of both classes of enzymes were restricted to  
112 the regions of leaf primordia in which veins are formed, and the border between the abaxial and  
113 adaxial sides (lower panel in Figure 2A and Figure S3). TAA-type aminotransferases and *YUCCA* genes  
114 are expressed in distinct as well as in overlapping domains (Figures 2, S2 and S3). Note particularly  
115 the overlapping expression of TAA1, TAR2, and YUC4 during the early stage of midvein development  
116 in 2 day-old primordia (Figures 2, S2 and S3). Since TAA and YUC act in succession in the same IPA  
117 pathway to produce IAA from tryptophan, co-expression of TAA and YUC in the same cells increases  
118 the chance to produce IAA.

119 The effect of inhibiting polar auxin transport on vein patterning, either by introducing genetic lesions  
120 (Okada et al., 1991), or by the exogenous application of diverse auxin transport inhibitors (Mattsson

121 et al., 1999; Sieburth, 1999), has been known for decades. The inhibition of auxin transport, either  
122 genetically or by the application of inhibitors, leads to the formation of small, round leaves with an  
123 indistinct midvein and fused vascular bundles around the periphery of their distal end (Mattsson et al.,  
124 2003; Mattsson et al., 1999). Therefore, it was proposed that in a developing *Arabidopsis* leaf, auxin  
125 transport defines the localization of leaf veins (Scarpella et al., 2006). In order to ascertain whether  
126 auxin transport also defines sites of auxin biosynthesis, we examined the distribution of cells which  
127 contained auxin biosynthetic enzymes (or their transcripts) in the leaf primordium after inhibition of  
128 auxin efflux.

129 In *Arabidopsis*, 1-N-naphthylphthalamic acid (NPA) abolishes polar auxin transport at concentrations  
130 above 10  $\mu\text{M}$  (Thomson et al., 1973). After treatment with increasing concentrations of NPA up to 320  
131  $\mu\text{M}$ , leaves became round and gradually smaller (Figure 3A). Furthermore, they developed an increased  
132 number of secondary veins and an exaggerated mesh of fused tracheary elements which surrounded  
133 the leaf margin, when compared to leaves of untreated plants (Cai et al., 2014) (Figure 3A). After  
134 blocking auxin transport, the domains of auxin biosynthetic enzymes expanded and continued to  
135 predict the regions of vein initiation (Figures 3B-3E, S4). In leaf lamina, with or without NPA treatment,  
136 PIN1 expression in the lamina was confined to cells which lay within auxin biosynthetic domains  
137 (Figure 3C-3F). The change in shape of the leaf after NPA treatment is correlated with the proliferation  
138 of provascular cells expressing both PIN1 and auxin biosynthetic genes in these leaves (Figure 3B-3F).  
139 In summary, NPA application changed the auxin biosynthesis pattern, but veins were nevertheless still  
140 formed in regions of auxin biosynthesis [Fig. S4A (lower panel), S4B and S4C]. Therefore, blocking  
141 auxin efflux causes auxin levels in non-vascular cells to drop, which then lowers cell division rates in  
142 the non-vascular cells causing vascular cells to proliferate laterally (Figure 3B-3F). NPA also induced  
143 the accumulation of auxin at the distal end of the leaf (as indicated by DR5::Venus in Figure 3H,  
144 compare upper versus lower panel), suggesting the distal sites also produce auxin (Abley et al., 2016;  
145 Avsian-Kretchmer et al., 2002).

146 ***In silico* modeling of spontaneous patterning of vascular cells in the leaf primordium**

147 In order to test whether cell specific auxin biosynthesis and its impact on neighboring cells is able to  
148 drive leaf vein patterning, we developed a theoretical model and performed a series of *in silico*  
149 experiments. We adapted Virtual Leaf, an open-source cell-based modeling framework that describes  
150 cells of the leaf lamina as a two-dimensional layer of interconnected polygons and accounts for  
151 mechanical properties of the tissue (Merks et al., 2011). Cell growth (an irreversible increase in cell  
152 area) proceeds in a quasi-static way at a rate which is defined by cell turgor pressure, a feature that  
153 can be influenced by auxin (see Methods section). A cell divides each time its area doubles, which  
154 invariably results in tissue growth over time. Cell wall stiffness and mechanics are included in the  
155 model by the definition of a resting length for each cell wall element. The shape of the tissue at each  
156 stage of growth is determined by minimizing the generalized energy function that contains a cell area  
157 term and a cell wall elasticity term (see computational model description in the Methods section).

158 To model leaf vein patterning in a growing leaf, we created a leaf tissue template that closely resembles  
159 a 2-day-old leaf primordium as our initial condition (Figure 4A). Following Lee, Feugier *et al.* (2014)  
160 and Merks, Guravage *et al.* (2011), we modelled primary vein development in two dimensions. The  
161 model tissue template consisted of cells expressing auxin biosynthesis genes, labeled as auxin  
162 producer cells, and cells that do not synthesize auxin. In the model, auxin producer cells correspond  
163 to the cells that express the auxin biosynthetic gene *TAR2*, and their layout in the tissue resembles the  
164 *TAR2*-driven GUS expression in 2-day-old control leaf-primordium (Figure 4A). The mechanical  
165 constraint due to the attachment of the leaf to the meristem is modeled by including a row of cells at  
166 the proximal part of the leaf (the petiole). These cells also act as auxin sinks, to model auxin drainage  
167 from the leaf via established veins at the stem (see computational model description in the Methods  
168 section). Further assumptions of our model are as follows: i) inter-celullar auxin transport via a  
169 diffusion-like process (PIN1 has a non-polar distribution in pre-provascular cells), ii) every cell in the  
170 leaf lamina grows by increasing its area at the same rate, iii) auxin is known to promote cell expansion

171 in aerial tissues (Fendrych et al., 2016; Perrot-Rechenmann, 2010), therefore when auxin concentration  
172 in a non-auxin producing cell crosses a threshold, then this cell starts expanding at a higher rate, iv)  
173 auxin-synthesising cells grow at all times at the basic rate (as defined in (ii)), and v) a relatively stiff  
174 epidermal cell layer, as it is known that leaf epidermal cells are stiffer than laminar cells (Onoda et al.,  
175 2015).

176 Simulations of this simple model, using the experimentally reported values of various parameters (see  
177 computational model description, Table S1) (Mitchison 1980), generated an *in silico* leaf-primordium  
178 that had grown to a size of either approximately 150 cells (Figures 4B) or 900 cells (Figure S5). This  
179 simulation result showed that, for a wide range of parameter values determining auxin-dependent cell  
180 growth (see computational model description in the Methods section), and without including  
181 polarized auxin transport, this model is able to reproduce i) proliferation of auxin synthesizing cells,  
182 ii) correct midvein positioning and iii) coordinated vascular cell elongation, as experimentally observed  
183 (Figures 4B-4C; S5 and Video S1). The shape of midvein generated by the model is robust with respect  
184 to different initial geometry and number of auxin synthesizing cells (Fig. 4A left and right panel and  
185 Fig. S7). Our simulations showed that localized auxin synthesis, followed by auxin diffusion, was able  
186 to account for the establishment of a time-dependent auxin gradient across the tissue of leaf  
187 primordium (inset of Figure 4B). Such an auxin gradient caused cells to grow at different growth rates.  
188 This in turn induced transverse forces acting laterally on the walls of midvein cells. These forces are  
189 are much larger in magnitude than the forces acting on other cells in the leaf lamina (Figure 4B). These  
190 forces exerted by the neighboring cells on the midvein cells, resulted in non-trivial strain and force  
191 distributions in the tissue that prevented the midvein cells from proliferating and thus resulted in the  
192 development of a thin vascular strand of elongated cells as is characteristic of procambial cells  
193 (Scarpella et al., 2006).



194 We next studied *in silico*, the impact of reducing auxin transport rates on midvein formation. An NPA-  
195 dependent reduction in auxin efflux led to a change in leaf vascular patterning and an expansion of  
196 the *TAR2* expressing domain, suggesting an extension of auxin biosynthesis sites (Figure 4E).  
197 Simulations of our model showed that a 25-fold lowering of the rate of auxin transport altered the  
198 formation of the midvein, and resulted in much wider proliferation of auxin-producing cells, as  
199 observed in experiments (Figure 4D). Reducing auxin transport rate led to higher auxin concentrations  
200 in auxin producer cells and steeper auxin gradients in the primordia (Figure 3H lower panel and inset  
201 of Figure 4D), with non-auxin producing cell receiving less auxin from auxin producing cells and hence,  
202 expanding in that case less than in leaves not treated with NPA. As a result, the auxin-dependent forces  
203 exerted by the neighboring cells on the midvein cells were not strong enough to prevent the  
204 proliferation of auxin producer cells (Figure 4D). The model predicted a midvein, several cells wide  
205 with a high auxin concentration, just as was observed in plants grown on inhibitory concentrations of  
206 NPA (Figures 3C-3E, 3F-3G, 3H and 4E). Furthermore, the midvein cells of the “NPA-treated” model  
207 leaf did not elongate in the same way as “untreated” simulations (Figure 4D and inset, and Video S2).

### 208 **Compensation of vein patterning in auxin biosynthesis mutants by NPA**

209 The model predicted that NPA effects were due to the accumulation of auxin in developing vascular  
210 cells. We therefore predicted that the reduced-efflux phenotype would be rescued by simultaneously  
211 decreasing the rate of auxin synthesis. Accordingly, we simulated the treatment of auxin biosynthetic  
212 mutants with NPA by simultaneously reducing both the auxin transport rate and the auxin production  
213 rate (2-fold). Under a range of conditions, wild-type leaf vascular patterning was restored, but only  
214 when the overall cell area growth rate was decreased (Figures 4F, S6A-D) (Methods section). *In planta*,  
215 the sequential removal of auxin biosynthetic enzymes resulted in the differentiation of fewer vascular  
216 strands, or even in the complete inhibition of vein development (Figures 5C, left panel and S1A-E).  
217 However, as predicted by the model, many of these phenotypes were abrogated by the application of

218 NPA (Figure 5C and 5D). This observation suggests that the cellular auxin concentration *per se* can  
219 define vascular cell differentiation in leaf primordia. We therefore conclude that an underlying pattern  
220 of auxin biosynthesis, influenced by the physical environment of the primordium, can direct vascular  
221 cell initiation.

### 222 ***In silico* modeling of PIN1 based auxin transport**

223 Polar auxin transport has long been considered a major driver of leaf vascular cell differentiation  
224 (Figure S1F) (Scheres and Xu, 2006). "With the flux" models of leaf vascular patterning assume that  
225 cells sense the overall rate of auxin flux and respond by reinforcing this flux with the polar deposition  
226 of PIN proteins. We therefore studied computationally the effect of polar auxin transport on the  
227 formation of the midvein in the presence of localized auxin biosynthesis (see Methods section) (Figure  
228 4G). Our simulation results show that polar auxin transport reproduces the midvein in much the same  
229 way as in the diffusion-only case (discussed above; Figure 4B), suggesting that these two patterning  
230 mechanisms may be linked or working in parallel.

### 231 **Regulation of auxin biosynthesis by auxin**

232 As the canalization of auxin requires a positive feedback loop between the plasma membrane's  
233 permeability to auxin and the rate of auxin flux (Mitchison, 1981), we next addressed whether auxin  
234 biosynthesis and flux participate at a transcriptional level in such a positive feedback loop. Mutants  
235 defective in auxin biosynthesis were examined for PIN1 expression. However, the polarization of PIN1  
236 proceeded as normal in five-day old leaves of *wei8-1tar2-1* and *yuc1yuc4* loss-of-function plants,  
237 despite a drastic reduction in the density of high order veins being observed (Figures 6B and 6C, lower  
238 panel of S1B, S1E and S1H). Next, neither TAA/TARs nor *YUCCA* transcription is induced by IAA (Figure  
239 6D). This experiment was performed three times with similar results. Verification in Genevestigator  
240 ([www.genevestigator.com](http://www.genevestigator.com)), also confirmed that the expression of *TAA1*, *TAR1*, *TAR2*, *YUC1*, *YUC2*, *YUC4*  
241 and *YUC6* genes is not induced by auxin. Further, our results also indicate that *YUC1*, *YUC2*, *YUC4* and

242 *YUC6* are repressed by auxin; similar results were reported by Suzuki and colleagues (Suzuki et al.,  
243 2015). Finally, we found that TAA1 expression was reduced as PIN1 accumulated and polarized in  
244 provascular cells (Figure 7B, 7C). IAA biosynthesis is therefore not induced by the canalization of IAA,  
245 but is likely to be integrated into an independent upstream patterning mechanism, as although TAA1  
246 was seen in domains in which PIN1 is absent (Figure 7D-7I); the opposite case was never observed.  
247 These observations suggest that auxin biosynthesis is not part of the positive feedback loop proposed  
248 to initiate vasculature development in leaves.

## 249 **Discussion**

250 In plants, polarized auxin transport is crucial for the initiation and regulation of several developmental  
251 programs. PIN-mediated auxin flux is widely accepted to be responsible for vascular patterning in  
252 leaves, with vascular differentiation occurring along axialized (canalized) auxin streams (Scarpella et  
253 al., 2006; Sieburth, 1999). Here we provide evidence that vein initiation also requires tissue specific  
254 local auxin biosynthesis. This supported by the fact that in mutants defective in local auxin  
255 biosynthesis, vein density is severely reduced (Cheng et al., 2006; Stepanova et al., 2008).

256 In leaf primordia, auxin transport does not only occur in developing veins, but also in epidermal cells  
257 (Abley et al., 2016). Blocking auxin transport results in smaller, round leaves which display a  
258 characteristic venation pattern. It was shown that cells accumulate more IAA when treated with NPA  
259 (Petersson et al., 2009; Petrasek et al., 2006). Therefore, we hypothesized that, since auxin is synthesized  
260 in both vein cells and epidermis cells, applying NPA would increase auxin concentration in both areas.  
261 This did not lead to an increase in leaf size, suggesting that auxin does not increase the rate of cell  
262 division in the epidermis. Similarly in roots, auxin induces cell division in pericycle cells, but not in  
263 epidermal cells (Himanen et al., 2002; Mähönen et al., 2014; Pacheco-Villalobos et al., 2016). Thus, in  
264 presence of NPA, epidermal cells (less sensitive to auxin) would divide less and as they surround

265 proliferating vascular cells in the lamina, this would supply a possible reason for the change in  
266 mechanical properties of the leaf identified by our model.

267 It was shown that in wild-type leaves, midvein provascular cells have potential characters of midvein  
268 progenitor cells (Tsugeki et al., 2009). This observation is consistent with a hypothesis that clonal  
269 populations of vein cells originate from those cells of the primordium which already have a vascular  
270 identity. This hypothesis is supported by an experiment using the expression of CRE recombinase  
271 under the control of the heat shock promoter (Ichihashi et al., 2011) which showed that in developing  
272 leaf, clonal sectors give rise to connected veins.

273 The patterning of organ growth and development is constrained and directed by the cells' physical  
274 environment, with mechanical stresses in particular influencing a broad range of developmental  
275 pathways (Sampathkumar et al., 2014). Microtubules responsively re-orientate their direction  
276 according to the stress landscape of a tissue in order to reinforce cells against the strains caused by  
277 directional growth (Hamant et al., 2008). Considering the pervasive influence of mechanical stress over  
278 plant development and patterning, it is likely that they also play a role in developing leaf primordium.

279 Our model is able to explain aspects of leaf development which include the production of auxin by  
280 pre-provascular cells of young leaves, the presence of vascular tissue in leaves treated with high  
281 concentrations of NPA (Mattsson et al., 1999), the relative insensitivity of vascular cell initiation to NPA  
282 when compared to a reduction in auxin biosynthesis, and the strong auxin response maxima observed  
283 in differentiating vascular cells (Bayer et al., 2009; Heisler et al., 2005). Using the model we present  
284 here, we were able to recreate faithfully four key features of vascular cell biogenesis in the absence of  
285 polar auxin transport: vascular strand formation, midvein positioning and coordinated vascular cell  
286 elongation. Our analysis suggests a critical role for the site of auxin biosynthesis in directing vascular  
287 cell differentiation. Thus, local auxin biosynthesis and a correspondingly high cellular auxin  
288 concentration need to be considered alongside directional auxin flux as an important factor defining

289 leaf vascular cell patterning. This conclusion is supported by the requirement for context-specific auxin  
290 biosynthesis to complement multiple *yucca* mutants (as opposed to exogenous application) (Cheng  
291 et al., 2006) and the fact that relatively small reductions in auxin amounts at a whole-plant level can  
292 cause surprisingly severe auxin-deficient phenotypes (Stepanova et al., 2011).

293 The complete sequence of genes necessary auxin biosynthesis is expressed in the leaf lamina  
294 (Mashiguchi et al., 2011; Stepanova et al., 2011; Zhao, 2012). Besides TAA1 whose expression in pre-  
295 provascular cells extends to regions that do not make veins and then is downregulated once pre-  
296 provascular cells become provascular cells, TAR2 is expressed exclusively in regions that make veins,  
297 where YUC2 and YUC4 are also expressed. This highlights an established correlation between auxin  
298 biosynthesis and vein development: in mutants defective in auxin biosynthesis, PIN1 expression and  
299 high-order vein density decrease. In contrast, suppression of auxin transport in *pin* mutants or using  
300 chemical auxin transport inhibitors has only a marginal impact on vein initiation. This suggests that  
301 auxin biosynthesis may act upstream auxin transport and is necessary for leaf vein initiation. According  
302 to the auxin transport-based canalization hypothesis, it is the auxin flux (rate of auxin molecules going  
303 through the membrane in a polar PIN1-dependent manner) that initiates veins. On the other hand,  
304 leaf veins are still formed when polar auxin transport is chemically abolished (as when a seedling is  
305 treated with NPA, 2,3,5-triiodobenzoic acid (TIBA) or any other auxin transport inhibitor) (Carland et  
306 al., 2016), which is hard to be explained only by the auxin transport-based canalization hypothesis.  
307 Together these observations underline the crucial role of tissue specific auxin biosynthesis which may  
308 act prior auxin canalization.

309 Our model predicted that reducing auxin biosynthesis and cell growth rates in the presence of NPA  
310 would restore normal venation patterns in *wei/tar* mutants. Indeed, treating auxin biosynthesis  
311 mutants, which display both reduced auxin levels and growth rates (they develop smaller leaves) with  
312 NPA, did consistently restore wild-type like vein patterning. Since cells accumulate more IAA when

313 treated with NPA (Keller et al., 2004; Petersson et al., 2009; Petrasek et al., 2006), the abnormal venation  
314 pattern in *wei/tar* mutants is probably due to cell specific decreases in auxin concentration. Therefore,  
315 the inhibition of auxin efflux by NPA would result in an increase of auxin concentration in pre-  
316 /provascular cells, which would then trigger the initiation of venation. However, since NPA also affects  
317 the shape of the leaf, it confirms that auxin transport in the epidermal cells plays an important role in  
318 maintaining leaf shape as previously proposed (Izhaki and Bowman, 2007; Scarpella et al., 2010).  
319 Taking into account cell auxin biosynthesis in the leaf lamina and auxin transport in epidermal cells in  
320 future models will enable us to understand how leaf shape and vein patterning are coordinated.  
321 In leaf lamina, auxin is transported through elongating vascular cells. However, it is not likely that auxin  
322 transport in elongating vascular cells is a prerequisite for midvein formation or vascular branching,  
323 since veins still form in presence of very high concentrations of NPA. Instead, the model predicts that  
324 mechanical forces exerted on the cells synthesizing auxin; forces which would be sufficient to direct  
325 the development of vascular strands. Indeed, the importance of geometrical and mechanical  
326 constraints during vascular tissue development in the Arabidopsis embryonic root has already been  
327 underlined (De Rybel et al., 2014). Our data show that unlike *PIN1*, whose expression is clearly  
328 stimulated by auxin, biosynthetic genes are either insensitive to, or repressed by auxin. Moreover, i)  
329 TAA1 expression is reduced, not increased, as PIN1 accumulates and polarizes in provascular cells; ii)  
330 PIN1 expression is strongly down-regulated in leaves of auxin biosynthesis mutants; and iii) whilst  
331 TAA1 can be seen in domains in which PIN1 is absent, the opposite case is never observed. Taken  
332 together, these observations suggest that local auxin biosynthesis in leaf primordia is not part of the  
333 auxin canalization positive feedback loop and plays an integral role in leaf vasculature development.

334 So far our model only focuses on the development of the midvein. The initial branching stages to  
335 secondary and tertiary veins is likely to require more complex models, which are outside the scope of  
336 this work. The search for factors which drive vascular patterning needs urgently to be redirected to

337 include the highly complicated patterns of auxin biosynthesis. The regulation of auxin biosynthesis by  
338 specific transcription factors (Cui et al., 2013) may complete such a mechanism.

### 339 **Author Contributions**

340 F.A.D., W.D.T., I.K. and K.P. conceived and designed the experiments. F.A.D., I.K. performed the  
341 experiments. J.D. performed the mathematical modeling. F.A.D., I.K., W.D.T., E.K., R.T. and K.P. analyzed  
342 the data. F.A.D., W.D.T, E.K. and K.P. wrote the paper. All authors discussed the results and commented  
343 on the manuscript. Correspondence and request for material should be addressed to F.A.D.  
344 ([franck.ditengou@biologie.uni-freiburg.de](mailto:franck.ditengou@biologie.uni-freiburg.de)) and K.P. ([klaus.palme@biologie.uni-freiburg.de](mailto:klaus.palme@biologie.uni-freiburg.de)).

### 345 **Acknowledgements**

346 This work could not have been accomplished without the help of colleagues, collaborators and friends  
347 who provided support, suggestions and materials. Particularly we would like to thank Jose Alonso and  
348 Yunde Zhao for sharing materials. We also gratefully acknowledge the excellent technical support  
349 from Beata Ditengou and Katja Rapp.

350 This work was supported by the Baden-Württemberg Stiftung, Deutsche Forschungsgemeinschaft (SFB  
351 746), the Excellence Initiative of the German Federal and State Governments (EXC 294),  
352 Bundesministerium für Forschung und Technik (BMBF SYSTEC, PROBIOPA, MICROSYSTEMS),  
353 Deutsches Zentrum für Luft und Raumfahrt (DLR 50WB1022), the Freiburg Initiative for Systems  
354 Biology, the European Union Framework 6 Program (AUTOSCREEN, LSHG-CT-2007-037897), the  
355 National Science Foundation (USA), and JSPS KAKENHI (Grant Number 24570047, 16K07396). EK  
356 acknowledges support from the Burroughs Wellcome Fund.

357

358

359

360 **REFERENCES**

- 361 Abley, K., Sauret-Gueto, S., Maree, A.F.M., and Coen, E. (2016). Formation of polarity convergences  
362 underlying shoot outgrowths. *Elife* 5. <https://doi.org/10.7554/eLife.18165.001>.
- 363 Avsian-Kretschmer, O., Cheng, J.C., Chen, L.J., Moctezuma, E., and Sung, Z.R. (2002). Indole acetic acid  
364 distribution coincides with vascular differentiation pattern during Arabidopsis leaf ontogeny. *Plant*  
365 *Physiology* 130, 199-209. DOI: <http://dx.doi.org/10.1104/pp.003228>.
- 366 Bayer, E.M., Smith, R.S., Mandel, T., Nakayama, N., Sauer, M., Prusinkiewicz, P., and Kuhlemeier, C. (2009).  
367 Integration of transport-based models for phyllotaxis and midvein formation. *Genes & Development*  
368 23, 373-384. DOI: 10.1101/gad.497009.
- 369 Blonder, B., Violle, C., Bentley, L.P., and Enquist, B.J. (2011). Venation networks and the origin of the  
370 leaf economics spectrum. *Ecol Lett* 14, 91-100. DOI: 10.1111/j.1461-0248.2010.01554.x.
- 371 Bruck, D.K., and Paolillo, D.J. (1984). Replacement of leaf primordia with IAA in the induction of  
372 vascular differentiation in the stem of *Coculus*. *New Phytologist* 96, 353-370.
- 373 Cai, X.T., Xu, P., Zhao, P.X., Liu, R., Yu, L.H., and Xiang, C.B. (2014). Arabidopsis ERF109 mediates cross-  
374 talk between jasmonic acid and auxin biosynthesis during lateral root formation. *Nature*  
375 *Communications* 5, 5833. DOI: 10.1038/ncomms6833.
- 376 Carland, F., Defries, A., Cutler, S., and Nelson, T. (2016). Novel Vein Patterns in Arabidopsis Induced by  
377 Small Molecules. *Plant Physiology* 170, 338-353. DOI: 10.1104/pp.15.01540.
- 378 Cheng, Y., Dai, X., and Zhao, Y. (2006). Auxin biosynthesis by the YUCCA flavin monooxygenases controls the formation of floral  
379 organs and vascular tissues in Arabidopsis. *Genes Dev* 20, 1790-1799. DOI: 10.1101/gad.1415106.
- 380 Cui, D., Zhao, J., Jing, Y., Fan, M., Liu, J., Wang, Z., Xin, W., and Hu, Y. (2013). The arabidopsis IDD14,  
381 IDD15, and IDD16 cooperatively regulate lateral organ morphogenesis and gravitropism by promoting  
382 auxin biosynthesis and transport. *PLoS Genet* 9, e1003759. DOI: 10.1371/journal.pgen.1003759.
- 383 De Rybel, B., Adibi, M., Breda, A.S., Wendrich, J.R., Smit, M.E., Novak, O., Yamaguchi, N., Yoshida, S., Van  
384 Isterdael, G., Palovaara, J., et al. (2014). PLANT DEVELOPMENT Integration of growth and patterning  
385 during vascular tissue formation in Arabidopsis. *Science* 345. DOI:10.1126/science.1255215.
- 386 Ditengou, F.A., Teale, W.D., Kochersperger, P., Flittner, K.A., Kneuper, I., van der Graaff, E., Nziengui, H.,  
387 Pinosa, F., Li, X., Nitschke, R., et al. (2008). Mechanical induction of lateral root initiation in Arabidopsis  
388 thaliana. *Proceedings of the National Academy of Sciences of the United States of America* 105, 18818-  
389 18823. DOI: 10.1073/pnas.0807814105.
- 390 Effendi, Y., Ferro, N., Labusch, C., Geisler, M., and Scherer, G.F. (2015). Complementation of the embryo-  
391 lethal T-DNA insertion mutant of AUXIN-BINDING-PROTEIN 1 (ABP1) with abp1 point mutated  
392 versions reveals crosstalk of ABP1 and phytochromes. *Journal of Experimental Botany* 66, 403-418.  
393 DOI: 10.1093/jxb/eru433.
- 394 Feller, C., Farcot, E., and Mazza, C. (2015). Self-Organization of Plant Vascular Systems: Claims and  
395 Counter-Claims about the Flux-Based Auxin Transport Model. *PLoS One* 10. DOI:  
396 10.1371/journal.pone.0118238.
- 397 Fendrych, M., Leung, J., and Friml, J. (2016). TIR1/AFB-Aux/IAA auxin perception mediates rapid cell  
398 wall acidification and growth of Arabidopsis hypocotyls. *Elife* 5. DOI: 10.7554/eLife.19048.
- 399 Galweiler, L., Guan, C., Muller, A., Wisman, E., Mendgen, K., Yephremov, A., and Palme, K. (1998).  
400 Regulation of polar auxin transport by AtPIN1 in Arabidopsis vascular tissue. *Science* 282, 2226-2230.
- 401 Gibson, L.J., Ashby, M.F., and Easterling, K.E. (1988). Structure and Mechanics of the Iris Leaf. *J Mater*  
402 *Sci* 23, 3041-3048. DOI: 10.1016/j.jbiomech.2004.09.027.
- 403 Hamant, O., Heisler, M.G., Jonsson, H., Krupinski, P., Uyttewaal, M., Bokov, P., Corson, F., Sahlin, P., Boudaoud, A., Meyerowitz, E.M., et al. (2008).  
404 Developmental Patterning by Mechanical Signals in Arabidopsis. *Science (Washington D C)* 322, 1650-  
405 1655. DOI: 10.1126/science.1165594.



406 Heisler, M.G., Ohno, C., Das, P., Sieber, P., Reddy, G.V., Long, J.A., and Meyerowitz, E.M. (2005). Patterns  
407 of auxin transport and gene expression during primordium development revealed by live imaging of  
408 the Arabidopsis inflorescence meristem. *Curr Biol* 15, 1899-1911. DOI: 10.1016/j.cub.2005.09.052  
409 Himanen, K., Boucheron, E., Vanneste, S., Engler, J.D., Inze, D., and Beeckman, T. (2002). Auxin-mediated  
410 cell cycle activation during early lateral root initiation. *Plant Cell* 14, 2339-2351. DOI:  
411 <http://dx.doi.org/10.1105/tpc.004960>.  
412 Ichihashi, Y., Kawade, K., Usami, T., Horiguchi, G., Takahashi, T., and Tsukaya, H. (2011). Key Proliferative  
413 Activity in the Junction between the Leaf Blade and Leaf Petiole of Arabidopsis. *Plant Physiology* 157,  
414 1151-1162. DOI: <http://dx.doi.org/10.1104/pp.111.185066>. Keller, C.P., Stahlberg, R., Barkawi, L.S., and  
415 Cohen, J.D. (2004). Long-term inhibition by auxin of leaf blade expansion in bean and arabidopsis.  
416 *Plant Physiology* 134, 1217-1226. doi: 10.1104/pp.103.032300.  
417 Lee, S.-W., Feugier, F.G., and Morishita, Y. (2014). Canalization-based vein formation in a growing leaf.  
418 *J Theor Biol* 353, 104-120. . DOI: 10.1016/j.jtbi.2014.03.005.  
419 Mähönen, A.P., ten Tusscher, K., Siligato, R., Smetana, O., Díaz-Triviño, S., Salojärvi, J., Wachsman, G.,  
420 Prasad, K., Heidstra, R., and Scheres, B. (2014). PLETHORA gradient formation mechanism separates  
421 auxin responses. *Nature* 515, 125-129. DOI: 10.1038/nature13663.  
422 Mashiguchi, K., Tanaka, K., Sakai, T., Sugawara, S., Kawaide, H., Natsume, M., Hanada, A., Yaeno, T.,  
423 Shirasu, K., Yao, H., et al. (2011). The main auxin biosynthesis pathway in Arabidopsis. *Proceedings of*  
424 *the National Academy of Sciences of the United States of America* 108, 18512-18517. DOI:  
425 10.1073/pnas.1108434108.  
426 Mattsson, J., Ckurshumova, W., and Berleth, T. (2003). Auxin signaling in Arabidopsis leaf vascular  
427 development. *Plant Physiology* 131, 1327-1339.  
428 Mattsson, J., Sung, Z.R., and Berleth, T. (1999). Responses of plant vascular systems to auxin transport  
429 inhibition. *Development* 126, 2979-2991.  
430 Merks, R.M.H., Guravage, M., Inzé, D., and Beemster, G.T.S. (2011). VirtualLeaf: an open-source  
431 framework for cell-based modeling of plant tissue growth and development. *Plant Physiol* 155, 656-  
432 666. DOI: 10.1104/pp.110.167619.  
433 Mitchison, G.J. (1980). *The Dynamics of Auxin Transport*, Vol 209.  
434 Mitchison, G.J. (1981). The Polar Transport of Auxin and Vein Patterns in Plants. *Philos T Roy Soc B* 295,  
435 461-471. DOI: 10.1098/rstb.1981.0154.  
436 Nishimura, T., Hayashi, K., Suzuki, H., Gyohda, A., Takaoka, C., Sakaguchi, Y., Matsumoto, S., Kasahara,  
437 H., Sakai, T., Kato, J., et al. (2014). Yucasin is a potent inhibitor of YUCCA, a key enzyme in auxin  
438 biosynthesis. *Plant Journal* 77, 352-366. DOI: 10.1111/tpj.12399.  
439 Okada, K., Ueda, J., Komaki, M.K., Bell, C.J., and Shimura, Y. (1991). Requirement of the Auxin Polar  
440 Transport System in Early Stages of Arabidopsis Floral Bud Formation. *The Plant Cell Online* 3, 677-  
441 684. DOI: 10.1105/tpc.3.7.677.  
442 Onoda, Y., Schieving, F., and Anten, N.P.R. (2015). A novel method of measuring leaf epidermis and  
443 mesophyll stiffness shows the ubiquitous nature of the sandwich structure of leaf laminas in broad-  
444 leaved angiosperm species. *J Exp Bot* 66, 2487-2499. DOI: 10.1093/jxb/erv024.  
445 Pacheco-Villalobos, D., Diaz-Moreno, S.M., van der Schuren, A., Tamaki, T., Kang, Y.H., Gujas, B., Novak,  
446 O., Jaspert, N., Li, Z.N., Wolf, S., et al. (2016). The Effects of High Steady State Auxin Levels on Root Cell  
447 Elongation in Brachypodium. *Plant Cell* 28, 1009-1024. DOI: 10.1105/tpc.15.01057.  
448 Perrot-Rechenmann, C. (2010). Cellular Responses to Auxin: Division versus Expansion. *Cold Spring*  
449 *Harbor Perspectives in Biology* 2. DOI: 10.1101/cshperspect.a001446.  
450 Petersson, S.V., Johansson, A.I., Kowalczyk, M., Makoveychuk, A., Wang, J.Y., Moritz, T., Grebe, M.,  
451 Benfey, P.N., Sandberg, G., and Ljung, K. (2009). An Auxin Gradient and Maximum in the Arabidopsis  
452 Root Apex Shown by High-Resolution Cell-Specific Analysis of IAA Distribution and Synthesis. *Plant*  
453 *Cell* 21, 1659-1668. DOI: 10.1105/tpc.109.066480.

454 Petrasek, J., Mravec, J., Bouchard, R., Blakeslee, J.J., Abas, M., Seifertova, D., Wisniewska, J., Tadele, Z.,  
455 Kubes, M., Covanova, M., et al. (2006). PIN proteins perform a rate-limiting function in cellular auxin  
456 efflux. *Science* 312, 914-918. DOI: 10.1126/science.1123542.  
457 Rolland-Lagan, A.G., and Prusinkiewicz, P. (2005). Reviewing models of auxin canalization in the  
458 context of leaf vein pattern formation in Arabidopsis. *Plant Journal* 44, 854-865. DOI:10.1111/j.1365-  
459 313X.2005.02581.x.  
460 Romanova-Michaelides, M., Aguilar-Hidalgo, D., Julicher, F., and Gonzalez-Gaitan, M. (2015). The wing  
461 and the eye: a parsimonious theory for scaling and growth control? *Wiley Interdiscip Rev Dev Biol.* 4,  
462 591-608. DOI: 10.1002/wdev.195.  
463 Tao, Y., Ferrer, J.L., Ljung, K., Pojer, F., Hong, F., Long, J.A., Li, L., Moreno, J.E., Bowman, M.E., Ivans, L.J.,  
464 et al. (2008). Rapid synthesis of auxin via a new tryptophan-dependent pathway is required for shade  
465 avoidance in plants. *Cell* 133, 164-176. doi: 10.1016/j.cell.2008.01.049.  
466 Sachs, T. (1969). Polarity and Induction of Organized Vascular Tissues. *Annals of Botany* 33, 263-275.  
467 Sampathkumar, A., Yan, A., Krupinski, P., and Meyerowitz, E.M. (2014). Physical Forces Regulate Plant  
468 Development and Morphogenesis. *Current Biology* 24, 475-R483. DOI: 10.1016/j.cub.2014.03.014.  
469 Sawchuk, M.G., Edgar, A., and Scarpella, E. (2013). Patterning of Leaf Vein Networks by Convergent  
470 Auxin Transport Pathways. *PLoS Genetics* 9. DOI: 10.1371/journal.pgen.1003294.  
471 Scarpella, E., Francis, P., and Berleth, T. (2004). Stage-specific markers define early steps of procambium  
472 development in Arabidopsis leaves and correlate termination of vein formation with mesophyll  
473 differentiation. *Development* 131, 3445-3455. DOI:10.1242/dev.01182.  
474 Scarpella, E., Marcos, D., Friml, J., and Berleth, T. (2006). Control of leaf vascular patterning by polar  
475 auxin transport. *Genes Dev* 20, 1015-1027. DOI:10.1101/gad.1402406.  
476 Scheres, B., and Xu, L. (2006). Polar auxin transport and patterning: grow with the flow. *Genes &*  
477 *Development* 20, 922-926. DOI:10.1101/gad.1426606.  
478 Sieburth, L.E. (1999). Auxin is required for leaf vein pattern in Arabidopsis. *Plant Physiology* 121, 1179-  
479 1190. DOI: <http://dx.doi.org/10.1104/pp.121.4.1179>.  
480 Stepanova, A.N., Robertson-Hoyt, J., Yun, J., Benavente, L.M., Xie, D.Y., Dolezal, K., Schlereth, A., Jurgens,  
481 G., and Alonso, J.M. (2008). TAA1-mediated auxin biosynthesis is essential for hormone crosstalk and  
482 plant development. *Cell* 133, 177-191. DOI: 10.1016/j.cell.2008.01.047.  
483 Stepanova, A.N., Yun, J., Robles, L.M., Novak, O., He, W., Guo, H., Ljung, K., and Alonso, J.M. (2011). The  
484 Arabidopsis YUCCA1 Flavin Monooxygenase Functions in the Indole-3-Pyruvic Acid Branch of Auxin  
485 Biosynthesis. *Plant Cell* 23, 3961-3973. DOI: 10.1105/tpc.111.088047.  
486 Thomson, K.S., Hertel, R., Muller, S., and Tavares, J.E. (1973). 1-N-Naphthylphthalamic Acid and 2,3,5-  
487 Triiodobenzoic Acid - in-Vitro Binding to Particulate Cell Fractions and Action on Auxin Transport in  
488 Corn Coleoptiles. *Planta* 109, 337-352. DOI: 10.1007/BF00387102.  
489 Tsugeki, R., Ditengou, F.A., Sumi, Y., Teale, W., Palme, K., and Okada, K. (2009). NO VEIN Mediates  
490 Auxin-Dependent Specification and Patterning in the Arabidopsis Embryo, Shoot, and Root. *Plant Cell*  
491 21, 3133-3151. DOI: 10.1105/tpc.109.068841.  
492 Wartlick, O., Mumcu, P., Julicher, F., and Gonzalez-Gaitan, M. (2011). Understanding morphogenetic  
493 growth control - lessons from flies. *Nat Rev Mol Cell Bio* 12, 594-604. doi: 10.1038/nrm3169.  
494 Won, C., Shen, X., Mashiguchi, K., Zheng, Z., Dai, X., Cheng, Y., Kasahara, H., Kamiya, Y., Chory, J., and  
495 Zhao, Y. (2011). Conversion of tryptophan to indole-3-acetic acid by TRYPTOPHAN  
496 AMINOTRANSFERASES OF ARABIDOPSIS and YUCCAs in Arabidopsis. *Proceedings of the National*  
497 *Academy of Sciences of the United States of America* 108, 18518-18523.  
498 DOI: 10.1073/pnas.1108436108  
499 Zhao, Y. (2012). Auxin biosynthesis: a simple two-step pathway converts tryptophan to indole-3-acetic  
500 acid in plants. *Mol Plant* 5, 334-338. . DOI: 10.1093/mp/ssf104.  
501

502

503 **Figures legends**

504 **Figure 1. Auxin biosynthesis mutants treated with auxin.** (A) Vein patterning in 12 day-old leaves  
505 WT (Col-0) and auxin biosynthesis mutant *wei8-1 tar2-1* grown in presence or absence of 1  $\mu$ M IAA.  
506 (B) Quantification of leaf surface area of plants presented in (A). Asterisk (\*\*\*) indicates significant  
507 difference at  $P < 0.001$  (T-test). Data are mean ( $n=40 \pm$  s.e.). n.s., non-significant difference at  $P < 0.05$   
508 (T-test). Scale Bar, 1mm.

509  
510 **Figure 2. Time resolved auxin biosynthesis map in Arabidopsis leaf.** Combinatorial expression  
511 of auxin biosynthetic genes (*TAA1*, *TAR2*, *YUC1*, *YUC2*, *YUC4*) at 2 DAG (C-H), 3 DAG (I-M) and 4 DAG  
512 (N-Q). (A) Longitudinal (above) and transverse (below) leaf sections. The blue dashed line defines the  
513 separation between adaxial (ad) and abaxial (ab) leaf polarity. (B) Schematic representation of the  
514 major auxin biosynthesis pathway (Trp, tryptophan; IPA, indole 3-pyruvic acid; IAA, indole3-acetic  
515 acid). (C-Q) Time resolved expression pattern of *pTAA1::TAA1-GFP* (C, D, I, J, N), *TAR2::GUS* (E, L, P),  
516 *YUC2::GUS* (F, M, Q), *YUC4::GFP* (G, H, K, O). D, H, and J are optical transversal sections of the leaf.  
517 Asterisks: yellow asterisks indicate *TAA1* and *YUC4* expression in the epidermis; white asterisks  
518 indicate *TAA1* and *YUC4* expression in the lamina; black asterisks show *TAR2* and *YUC2* expression in  
519 provascular tissues. SAM indicates the position of the shoot apical meristem. Scale bar, 20  $\mu$ m unless  
520 otherwise indicated. DAG, days after germination. The data supporting auxin biosynthesis in 5 DAG  
521 leaf are presented in Figures S1 and S2.

522  
523 **Figure 3. Effect of NPA on leaf vein patterning, auxin biosynthesis and distribution.** (A) Vein  
524 patterning in 12 day-old leaves grown in presence of increasing concentrations of NPA. (B-F),  
525 Immunodetection of both *TAA1-GFP* and *PIN1* in 4 day-old leaves grown in presence of NPA. Boxed  
526 Inset in (D) shows polar *PIN1* at the plasma membrane of vascular cells arrowed in (D) and (E). F,  
527 Transversal sections of leaves presented in B and C, respectively. White dashed lines indicate leaf

528 boundaries. Yellow dashed lines indicate pre-provascular cells expressing both TAA1 (red) and PIN1  
529 (green). Note the proliferation of pre-provascular cells in a concave shape in 10  $\mu$ M treated leaf. G,  
530 Percentage of cells expressing both PIN1 and TAA1 in leaf lamina. By dividing by the total number of  
531 cells constituting leaf primordium. Stars (\*) indicate significant difference to control at  $P < 0.01$  (t-test).  
532 Data are means ( $n=40 \pm$  s.e.). H, DR5::Venus (auxin levels) and PIN1p::PIN1-GFP in 3, 4 and 5 day-old  
533 leaves. Top panel: control leaves. Lower panel: leaves treated with 10  $\mu$ M NPA. Scale, 500  $\mu$ m in (A),  
534 200  $\mu$ m (F) and 10  $\mu$ m (H).

535  
536 **Figure 4. *In silico* modeling of spontaneous patterning of vascular tissue in leaf primordium.**

537 (A) Left, leaf template resembling a leaf primordium. The model assumes local auxin synthesis (dark  
538 green colored cells), leaf petiole cells (grey colored cells), a relatively stiff outermost surface of the  
539 epidermal layer, non-directional transport of auxin and auxin-dependent cell growth; right *TAR2*-  
540 driven GUS expression in 2-day-old control leaf-primordia. (B) Left, simulation result of our model  
541 with the parameter values as given in Table S1. The model was able to reproduce a realistic mid-vein  
542 made up of elongated cells and branched vasculature, as observed in 4-day-old control leaf-  
543 primordia (see C). Forces on the vertices of a cell in the leaf tissue is shown by an arrow representing  
544 the force vector, in the case of a control-leaf; Magenta colored arrows represent forces on the vertices  
545 of midvein cells, and blue arrows represent forces on the vertices of other cells in the leaf primordia.  
546 Inset shows cellular auxin concentration in the leaf primordia. (C) *TAR2*-driven GUS expression in a  
547 4-day-old control leaf-primordia. (D) Simulation result with a 25-fold lowered rate of auxin transport.  
548 All the other parameter values were kept the same as in (C). Inset shows cellular auxin concentration  
549 in the leaf primordia. (E) *TAR2*-driven GUS expression in 3-day-old NPA-treated leaf-primordia. (F)  
550 Simulation result for reduced auxin production and reduced transport rate. A realistic midvein could  
551 be produced in simulation only when the overall cell area growth rate was decreased, consistent with  
552 NPA treatment rescue of an auxin biosynthesis mutant. (G) *In silico* modeling of PIN1 based auxin

553 transport. The model incorporates PIN1 based transport of auxin, and is able to reproduce a realistic  
554 mid-vein even in the case of no diffusion ( $d=0$ ) and PIN1 based transport only. Inset shows cellular  
555 auxin concentration in the leaf primordia. The arrows indicate the net direction, but not the  
556 magnitude of the auxin flux. The lack of clear polarity of the auxin flow in the epidermal cells is likely  
557 due to the absence of any external source of epidermal auxin. Asterisks (\*) denote provascular cells.  
558

559 **Figure 5. Compensation of vein patterning in auxin biosynthesis mutants by NPA.** (A) Vein  
560 patterning in 10-day old wild-type (WT) leaf. (B) WT leaf after NPA treatment. (C) *wei8-1tar2-1* leaf  
561 treated with (right) or without (left) 10  $\mu$ M NPA. Leaves were classified according to their vein  
562 architecture. Class I, indistinguishable from untreated WT. Leaves contain a single midvein reaching  
563 distally to the tip of the leaf. Class II, fused midveins and Class III, fused midveins and increased  
564 frequency of fused high order veins. (D) Genotype dependent distribution of Class I, II and III leaves  
565 in seedlings treated with NPA. Scale bar, 500  $\mu$ m.

566  
567 **Figure 6. Auxin does not regulate PIN1 polarisation nor its own biosynthesis.** (A), (B) and (C)  
568 Immunocyto detection of PIN1 in WT (A), in *wei8-1 tar2-1* (B) and in *yuc1 yuc4* double mutants (C).  
569 Arrowheads indicate PIN1 polarity; dashed circle, intervascular pre-provascular cells expressing PIN1  
570 visible in WT but absent in *wei8-1 tar2-1* and in *yuc1 yuc4* double mutants. (D), Quantification of  
571 *PIN1*, *TAA1*, *TAR1*, *TAR2*, *YUC1*, *YUC2*, *YUC4* mRNA in 3 day-old WT seedlings incubated in the  
572 presence of 1  $\mu$ M or 5  $\mu$ M IAA for 4 hours. (Parentheses) Fraction of primordia showing the displayed  
573 features. Scale bar, 20  $\mu$ m.

574  
575 **Figure 7. Gradual subcellular localization of PIN1 in dynamic TAA1 expression domains.** PIN1  
576 and TAA1-GFP subcellular localization in 6-day old leaf. (A-C), Dynamic expression pattern of TAA1-  
577 GFP and subcellular localization of PIN1 in pre-provascular, provascular and mature vascular cells.

578 (A), PIN1 localization. (B), TAA1-GFP. (C), Panel (A) and panel (B) merged. (D-F), Higher magnification  
579 of images in dotted frames in (A-C), respectively. (G-I), Higher magnification of images in solid frames  
580 in (A-C), respectively). Arrowheads indicate PIN1 polarity in provascular cells. Asterisks (\*): white  
581 asterisks indicate developing provascular tissues, yellow asterisks indicate pre-provascular cells with  
582 PIN1 non-polar. Yellow inset in (C) shows respectively polar PIN1 and TAA1 down regulation in  
583 mature vasculature. Scale bars, 20  $\mu\text{m}$  (A-C), 10  $\mu\text{m}$  (D-I).

584

## 585 **Methods**

586 **Plant material and growth conditions.** Columbia Arabidopsis ecotype (Col-0) as wild type (WT),  
587 *YUCp::GUS* reporter lines and *yuc* mutants single and multiple combinations were as previously  
588 described (Cheng et al., 2006; Ditengou et al., 2008). Details of *pTAA1::TAA1-GFP*, *wei8-1*, *wei8-1tar2-*  
589 *1* and *wei8-1tar1-1tar2-1* and *pin1* mutants are as previously described (Stepanova et al., 2008);  
590 (Galweiler et al., 1998). *Wei8* (Stepanova et al. Cell 2008) is also known as *sav3* (Tao et al., 2008). To  
591 more accurately reflect the corresponding protein's function, *WEI8* was subsequently renamed *TAA1*  
592 *TRYPTOPHAN AMINOTRANSFERASE OF ARABIDOPSIS1* by Tao et al. (2008). YUC4p::GFP seeds were  
593 obtained from Yunde Zhao. Seeds were surface-sterilized and sown on solid Arabidopsis medium (2.3  
594 g/liter MS salts, 1% sucrose, 1.6% agar-agar (pH 6.0) adjusted with KOH). After vernalization for 2 days  
595 at 4°C, seeds were germinated under a long day period (16h light, 8h darkness). In polar auxin  
596 transport inhibitory experiments, seedlings were grown on media supplemented with 10  $\mu\text{M}$  NPA for  
597 0 to 10 days.

598

599 **Immunocyto detection.** Seedlings of different ages were fixed with 4% paraformaldehyde in PBS (pH  
600 7.3) and used for whole-mount *in situ* immunolocalisation as previously described (Ditengou et al.,  
601 2008). PIN1 was detected using a mouse anti-PIN1 monoclonal antibody (1:100) and TAA1-GFP with  
602 a rabbit anti-GFP antibody (1:600) (Molecular Probes). YUC4p::GFP was detected with a rabbit anti-GFP

603 polyclonal antibody (1:200). Samples were incubated with secondary antibodies (Alexa 488 goat anti  
604 mouse and Alexa 555 goat anti rabbit from Invitrogen, both at 1:1000 dilution).

605  
606 **Microscopy and analysis.** Histological detection of  $\beta$ -glucuronidase (GUS) activity was performed  
607 according to (Scarpella et al., 2004). For analysis of vascular patterns, seedlings were cleared in 100%  
608 ethanol overnight. They were re-hydrated and dissected under 50% glycerol, then mounted in chloral  
609 hydrate:glycerol:water (8:3:1, w/v/v). GFP plants were fixed with 4% formaldehyde at room temperature  
610 and mounted in Prolong Gold antifade reagent (Molecular Probes). For light microscopy, samples were  
611 observed with a Zeiss Axiovert 200M MOT (Carl Zeiss, Goettingen, Germany) for high magnification  
612 pictures. By contrast, low magnification views were taken with a Zeiss Stemi SV11 Apo  
613 stereomicroscope (Carl Zeiss, Goettingen, Germany), viewed under differential interference contrast  
614 (DIC) optics or dark field illumination. Fluorescent proteins were analyzed with a Zeiss LSM 5 *DUO*  
615 scanning microscope or AZ-C1 Macro Laser Confocal Microscope (NIKON GMBH, Düsseldorf,  
616 Germany). GFP was excited using the 488nm laser line in conjunction with a 505–530 band-pass filter.  
617 To simultaneously monitor Alexa488 and Alexa 555 fluorescences, we used multi-tracking in frame  
618 mode and the emission was separated using the on-line unmixing feature of the Meta spectral  
619 analyzer. Images were extracted and analyzed with the Zen2009 software (Carl Zeiss MicroImaging)  
620 and representative of at least 20 individual plants.

621  
622 **Real time RT-PCR.** The effect of auxin on gene expression was quantified by real-time quantitative  
623 RT-PCR. Arabidopsis seeds were deposited on 6-7 mm filter paper strips lying at the surface of solid  
624 Arabidopsis growth medium (see above). This procedure facilitates the transfer of seedlings on the  
625 filter paper from Agar to liquid Arabidopsis growth medium (not containing Agar) supplemented with  
626 or without IAA. Three-day old Arabidopsis seedlings were transferred to medium containing either  
627 mock (control) or IAA. After treatment the filter paper strips with seedlings were transferred to RNA-

628 later solution (Ambion). Total RNA was extracted using the RNeasy Micro Kit (Qiagen). Reverse  
629 transcription was performed using 1 $\mu$ g of total RNA and RevertAid M-MuLV reverse transcriptase  
630 (Fermentas, St Leon-Rot, Germany) according to the manufacturer's instructions. qRT-PCR was  
631 performed using Maxima SYBR Green kit (Fermentas) on a Light cycler480 Real-Time system (Roche,  
632 Mannheim, Germany). The gene-specific primers for qRT-PCR are listed in Table S2. The efficiency of  
633 each primer pair was determined by examination of a standard curve using serial dilutions of genomic  
634 DNA. The PCR was performed using a three-step protocol including melting curve analysis. The  
635 relative gene expression was analyzed using the  $\Delta$ - $\Delta$  cycle threshold method. ACTIN2 served reference  
636 gene, three biological replicates and three technical replicates were used to evaluate gene expression.  
637

638 **Image post-processing.** All images depicting PIN1/TAA1 double labeling or PIN1/DAPI are 3D  
639 reconstructions of optical sections with Imaris 7.4.0 (Bitplane AG, Zurich, Switzerland). All images were  
640 assembled using Microsoft PowerPoint 2013.

641

#### 642 **Computational model description.**

643 A cell-based modeling framework, Virtual Leaf, that couples vertex dynamics and chemical dynamics,  
644 was adapted to study the vein patterning in leaves *in silico* (Merks et al., 2011). We simplified the  
645 model system by representing the longitudinal section of leaf primordia by a two-dimensional  
646 network of interconnected polygons (cells), specified by the surrounding vertices. Each cell, in this  
647 framework, is characterized by an energy function which describes the balance between turgor  
648 pressure and cell wall stiffness,

$$649 \quad E = \lambda_A \sum_{\alpha} (A_{\alpha} - A_{\alpha}^0)^2 + \lambda_s \sum_{\langle ij \rangle} (l_{ij} - l_{ij}^0)^2 \quad (1)$$

650  $A_{\alpha}$  is the area of the cell  $\alpha$  and  $A_{\alpha}^0$  is the preferred (rest) area of that cell.  $l_{ij}$  is the length of the cell  
651 wall linking nodes  $i$  and  $j$  of the polygons and the sum over  $\langle ij \rangle$  is over all links.  $\lambda_A$  is a parameter



652 setting the cell resistance to compression or expansion and  $\lambda_s$  describes the cell wall stiffness. Cell  
653 behaviors, like expansion, division and active shape changes are described by minimization of the  
654 energy function  $E$ . The minimization depends on the dimensionless ratio  $\lambda_A l_0^2 / \lambda_s$ , where  $l_0$  is a cell  
655 size dependent lengthscale. The value of the dimensionless ratio used in our simulations was 0.01, in  
656 accordance with (Merks et al., 2011).

657 To study vein patterning in developing leaf primordia, we created a leaf template to resemble the  
658 tissue of a leaf primordium, as in Fig. 5A. Cells at the base of this template (cells colored in gray in Fig.  
659 5A) were assigned with very high cell stiffness  $\lambda_s$ , in order to implement proper boundary conditions,  
660 namely the effect of the firm attachment of the leaf primordia to the shoot apical meristem. The  
661 outermost layer of cells in the leaf primordia represents the stiff epidermal layer. To incorporate these  
662 properties of the epidermal cells in our model, the outermost cell walls of the cells at the perimeter of  
663 the leaf primordium were assumed to have higher stiffness than the internal cell walls. We used a value  
664 for the ratio of perimeter to internal cell wall stiffness within the experimentally reported range, i.e  
665  $\lambda_s(\text{perimeter}) = 12\lambda_s(\text{interior})$  (Gibson et al., 1988; Onoda et al., 2015). In our model auxin is  
666 synthesized locally in only few cells and subsequently auxin diffuses across the neighboring cells in  
667 the tissue. The leaf primordia in our model consists of three different cell types:

- 668 (1) auxin synthesizing cells (colored in dark green in Fig. 4A),
- 669 (2) cells that do not synthesize auxin (colored in light green in Fig. 4A),
- 670 (3) petiole cells (colored in grey in Fig. 4A) .

671 The latter is a computational cell type aimed to simulate the firm attachment of the leaf to the  
672 meristem and the drainage of auxin.

673 The general dynamic equation governing the amount of auxin  $n_\alpha$  in a cell is given by:

674 
$$\frac{\partial n_\alpha}{\partial t} = s(\alpha) + d \sum_{\beta} l^{\alpha\beta} \left( \frac{n_\beta}{A_\beta} - \frac{n_\alpha}{A_\alpha} \right) (2)$$

675 Here  $l^{\alpha\beta}$  is the length of the cell wall separating cells  $\alpha$  and  $\beta$ , across which the auxin diffusion takes  
 676 place and  $A_\alpha$  is the area of the cell  $\alpha$ . The first term describes auxin production at a constant rate  
 677  $s(\alpha) = s_0\delta_{\alpha,p}$ , non-zero only for the auxin producer cells  $p$ . Auxin production is limited to only few  
 678 cells (cell colored in dark green in Fig. 4A). The second term accounts for auxin spreading in the tissue  
 679 of leaf primordia by a diffusion process, where  $d$  is a constant that measures the speed of inter-cellular  
 680 auxin transport and is related to the auxin diffusion coefficient. Auxin is drained through cells located  
 681 at the base of leaf primordia. To simulate this auxin drainage, from these cells (termed “petiole cells”  
 682 and colored in grey in Fig. 4A), we implement perfectly absorbing boundary condition at the petiole  
 683 cell walls.

684 The typical cell size in the simulation has a length of about  $l_0 \cong 10\mu m$ . We used the experimentally  
 685 reported range,  $10^{-5} - 10^{-8}ms^{-1}$ , for the value of speed of auxin transport  $d$  (Mitchison, 1980).

686 At time  $t = 0$  the amount of auxin is  $n = 0$  in all the cells in the leaf primordia. For  $t > 0$  auxin is  
 687 produced only in auxin synthesizing cells at a constant rate  $s_0$ . Motivated by experimental images of  
 688 a 2DAG leaf, in our simulation we start initially with only four auxin synthesizing cells, but our  
 689 qualitative results are not dependent on the initial geometry (Fig. 4A left and right panel and Fig. S7).

690 All the cells in the leaf primordia grow by increasing their target area at the same constant rate  $g_0 =$   
 691  $6 \cdot 10^{-14}m^2s^{-1}$  and divide over their shortest axis once their area is doubled. However, in any cell except  
 692 the auxin synthesizing cell, if the auxin concentration increases beyond a threshold value  $c^* =$   
 693  $2.4 \cdot 10^9m^{-2}$ , then the growth rate of that cell increases to a value  $g > g_0$ . We tested a broad range of  
 694 cell area growth rates  $g$  and found that main vein formation and main vein bifurcation is a robust  
 695 feature appearing for the values of ratio  $g/g_0 \gtrsim 3$  and up to at least several hundreds (Fig. S8).

696 The force  $F(X_i)$  on each node  $i$  at vector position  $X_i$  of a cell is given by:

$$697 \quad F(X_i) = -\frac{\partial E}{\partial X_i} \quad (3)$$

$$698 \quad = -\lambda_A \sum_{\alpha, i \in \alpha} (A_\alpha - A_\alpha^0) [R(X_{i+1}^\alpha - X_{i-1}^\alpha)] + \lambda_s \sum_j (l_{ij} - l_{ij}^0) \tilde{\mathbf{u}}_{X_i X_j} \quad (4)$$

699 where  $R$  is the 90 degree rotation matrix:

$$700 \quad R = \begin{bmatrix} 0 & -1 \\ 1 & 0 \end{bmatrix},$$

701  $\tilde{\mathbf{u}}_{X_i X_j}$  is the unit vector joining the vertices at position  $X_i$  and  $X_j$ , the summation  $\sum_{\alpha, i \in \alpha}$  is over all  
702 cells that contain node  $i$  and  $X_{i+1}^\alpha$  ( $X_{i-1}^\alpha$ ) denotes the subsequent (antedecent) to node  $i$  as the nodes  
703 in cell  $\alpha$  are traversed clockwise.

704 The force vector field of an *in silico* growing leaf primordium is shown by arrows in Fig. 4B,D,F. Magenta  
705 colored arrows represent net force acting on the vertices of auxin producing cells, whereas blue  
706 colored arrows represent net force acting on the vertices of non-auxin producing cells in the leaf  
707 primordia. The values for the model parameters are shown in Table S1.

708  
709 **PIN1 based auxin transport.** In addition to the passive diffusive transport of auxin, we also studied,  
710 in our model, the effect of active transport of auxin via PIN1 only. The general dynamic equation  
711 governing the amount of auxin  $n_\alpha$  in cell  $\alpha$  in this case is given by:

$$712 \quad \frac{\partial n_\alpha}{\partial t} = s_0(\alpha) + \tau \sum_{\beta} \left( P_{\beta|\alpha} \frac{n_\beta}{A_\beta} - P_{\alpha|\beta} \frac{n_\alpha}{A_\alpha} \right). \quad (S1)$$

714 Here  $P_{\beta|\alpha}$  is the amount of PIN1 on the cell wall of cell  $\beta$  neighboring cell  $\alpha$ ,  $\tau$  is the constant related  
715 to the auxin transport via PIN1 and  $A_\beta$  is the area of cell  $\beta$ . The above equation is an extension of  
716 Equation (1) given above with  $d = 0$ . The only addition being the second term on the right hand side  
717 of Equation S1, which describes the intercellular transport of auxin via PIN1.

718 The rate of attachment of PIN1 to a given cell wall that separates cell  $\alpha$  and cell  $\beta$  depends on the  
719 amount of auxin in that particular cell,  $\alpha$  and its neighboring cell  $\beta$ , as well as the amount of  
720 cytoplasmic PIN1,  $P_\alpha$  in that cell. The flux of PIN1 molecules attaching to a given cell wall is given by:

$$721 \quad \varphi_{\alpha|\beta} = (n_\alpha - n_\beta), \quad \text{if } n_\alpha > n_\beta$$
$$722 \quad = 0, \quad \text{if } n_\alpha \leq n_\beta$$

723

724 Equation governing the amount of PIN1 on the wall of a given cell is given by:

725 
$$\frac{dP_{\alpha|\beta}}{dt} = k_{on}\varphi_{\alpha|\beta}P_{\alpha}. (S2)$$

726 Here,  $P_{\alpha}$  is the amount of cytoplasmic PIN1 in cell  $\alpha$  and  $k_{on}$  is the rate of association of cytoplasmic  
727 PIN1 to the wall of cell  $\alpha$  neighboring cell  $\beta$ .

728 The dynamic equation governing the amount of cytoplasmic PIN1,  $P_{\alpha}$  in cell  $\alpha$  is given by:

729 
$$\frac{dP_{\alpha}}{dt} = - \sum_{\beta} k_{on}\varphi_{\alpha|\beta}P_{\alpha} + p_0. (S3)$$

730 where  $p_0$  is the rate of PIN1 production in each and every cell.

731

732 Figure 6G shows the simulation result of our model including the PIN1 based auxin transport,  
733 described by Equations S1-S3, with the parameter values given in Table S3.

734 Our simulation results show the formation of a normal mid-vein also in the case of no diffusion ( $d =$   
735 0) and PIN1 only transport, see Figure 4G (main text).

736

737 **Compensation of vein patterning in auxin biosynthesis mutants by NPA.** In our model, the area  
738 growth rate of non-auxin producing cells depend on the cellular auxin concentration. When the auxin  
739 concentration in a non-auxin producing cell crosses a specified threshold, its area growth rate  
740 increases, as a result these cells grow faster than the auxin producing cells, inducing transverse forces,  
741 acting laterally on the walls of midvein cells, much larger in magnitude than the forces acting on other  
742 cells in the leaf primordia. This prevents the midvein cells from proliferating, thus resulting in a thin  
743 vascular strand of elongated cells.

744 In this section, using our model, we will see how reducing auxin production rate requires a  
745 simultaneous reduction in auxin transport rate as well as overall cell area growth rate in order to  
746 recover wild-type midvein patterning. Our model therefore proposes a mechanism through which a

747 reduction in auxin biosynthesis can rescue the NPA-induced defects caused by auxin accumulation in  
748 the midvein.

749 Continuous auxin production in auxin synthesizing cells and inter-cellular auxin transport sets up an  
750 auxin concentration gradient in the growing leaf primordia. Therefore, auxin concentration threshold,  
751 beyond which non-auxin producing cells start to grow faster, depends upon several kinetic parameters  
752 that also determine auxin concentration gradient.

753 Auxin concentration of a cell in a growing leaf lamina changes according to the following equation:

754 
$$\frac{\partial c_{\alpha}(x, t)}{\partial t} = s(\alpha) + D \frac{\partial^2 c_{\alpha}(x, t)}{\partial x^2} \quad (S4)$$

755 where,  $c_{\alpha}(x, t)$  is the auxin concentration of cell  $\alpha$  at position  $x$  and time  $t$  in the leaf primordia,  
756  $s(\alpha) = s_0 \delta_{\alpha,p}$ , describes auxin production at a constant rate  $s_0$ , non-zero only for auxin producing cells  
757  $p$ , and  $D$  is the auxin diffusion. Since leaf primordia is growing in area due to an irreversible growth in  
758 the area of an individual cell, as a result, the cellular auxin concentration  $c = n/A$ , where  $n$  is the  
759 number of auxin molecules in a cell of area  $A$ , is effected,

760 
$$\frac{\partial c_{\alpha}(x, t)}{\partial t} = \frac{\partial n_{\alpha}}{\partial t} - \frac{n_{\alpha}}{A_{\alpha}^2} \frac{\partial A_{\alpha}}{\partial t}. \quad (S4)$$

761  
762 The first term in Equation (S4) describes the change in auxin concentration due to auxin transport, and  
763 is given by Equation (2) in the main text. The second term describes the change in auxin concentration  
764 as result of dilution of auxin due to an increase in cell area due to cell area growth. Similar situation  
765 of an area growth induced dilution of a chemical specie, growth hormone, morphogens, etc., is  
766 encountered in other biological systems (Romanova-Michaelides et al., 2015; Wartlick et al., 2011).

767  
768 The change in auxin concentration of cell  $\alpha$  at position  $x$  and time  $t$ , can thus be written down as:

769 
$$\frac{\partial c_{\alpha}(x, t)}{\partial t} = s(\alpha) + D \frac{\partial^2 c_{\alpha}}{\partial x^2} - g c_{\alpha} \quad (S5)$$

770 where,  $g$  is the area growth of a cell. The steady state solution of Equation (S5) for a delta source of  
771 auxin is given by:

772 
$$c = \frac{s_0}{\sqrt{gD}(1-e^{-2\lambda L})} (e^{-2\lambda L} e^{\lambda x} + e^{-\lambda x}) \text{ for } x \geq 0. \text{ (S6)}$$

773  
774 Equation (S6) shows the dependence of auxin concentration threshold  $c^*$  on auxin production rate  $s_0$ ,  
775 auxin diffusion rate  $D$ , and cell area growth rate  $g$ . Auxin diffusion rate is related to the auxin  
776 transport rate  $d$ , which is the actual parameter used in our model to describe auxin transport. It can  
777 be seen that lowering auxin production  $s_0$ , as in auxin biosynthesis mutants, requires a simultaneous  
778 lowering of auxin transport rate  $d$ , similar to NPA treatment, as well as overall cell area growth rate  $g$   
779 (Figures S7 and 4F, main text).

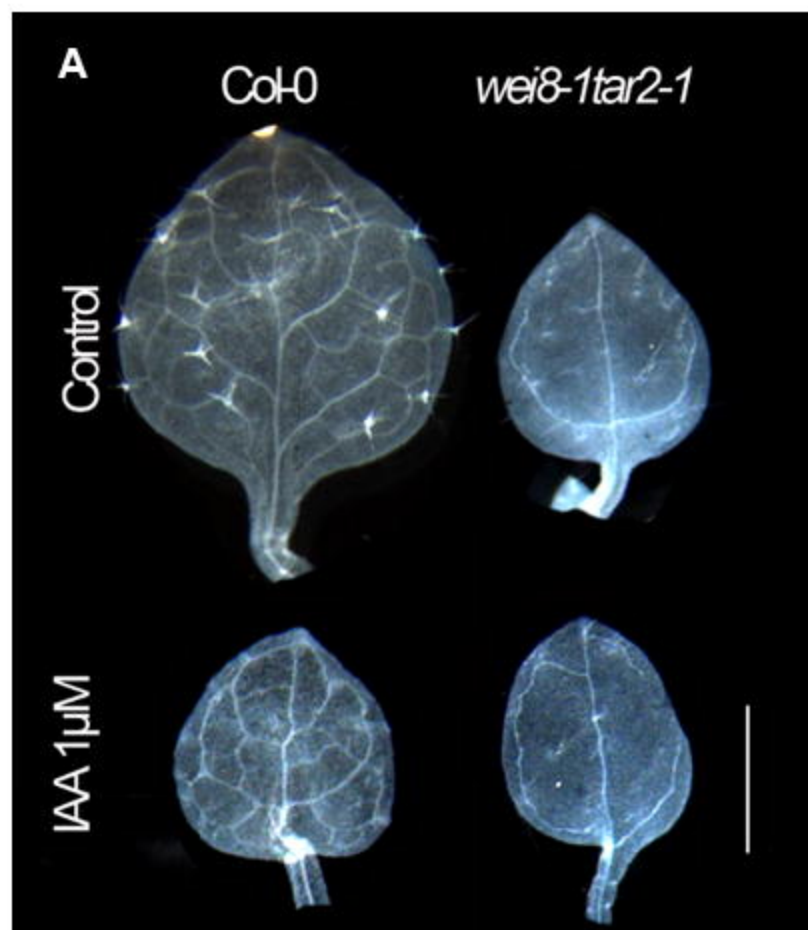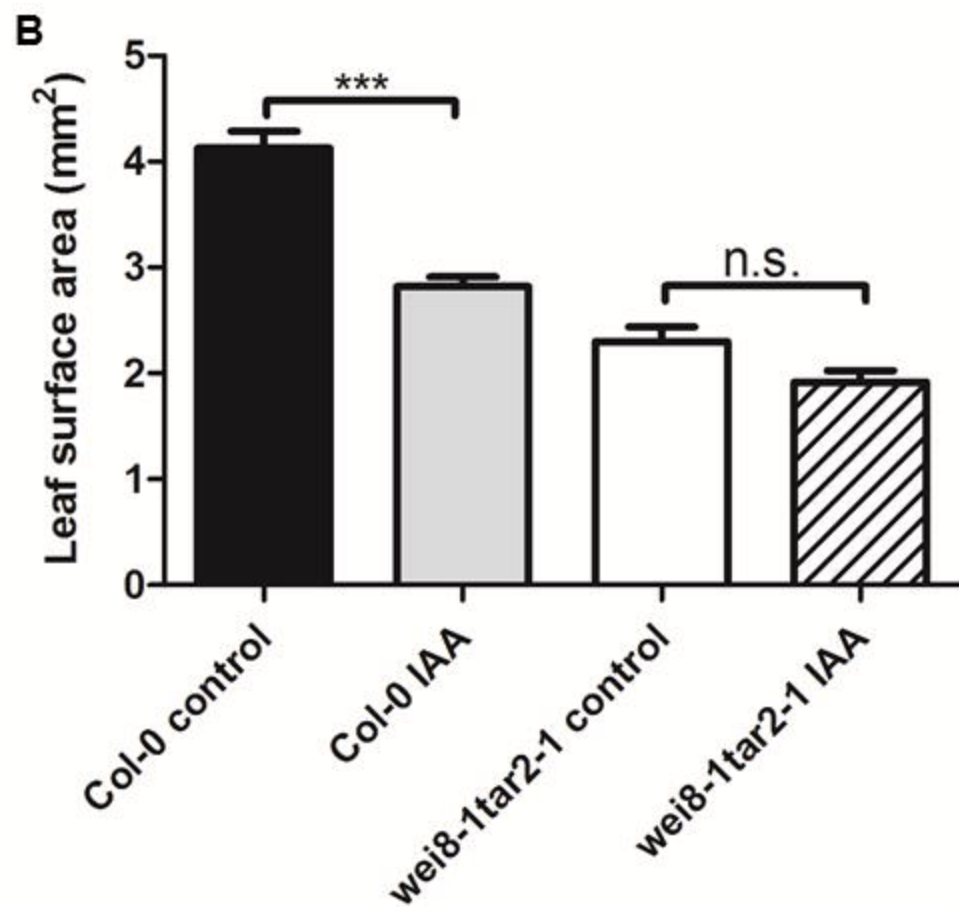

Fig. 1

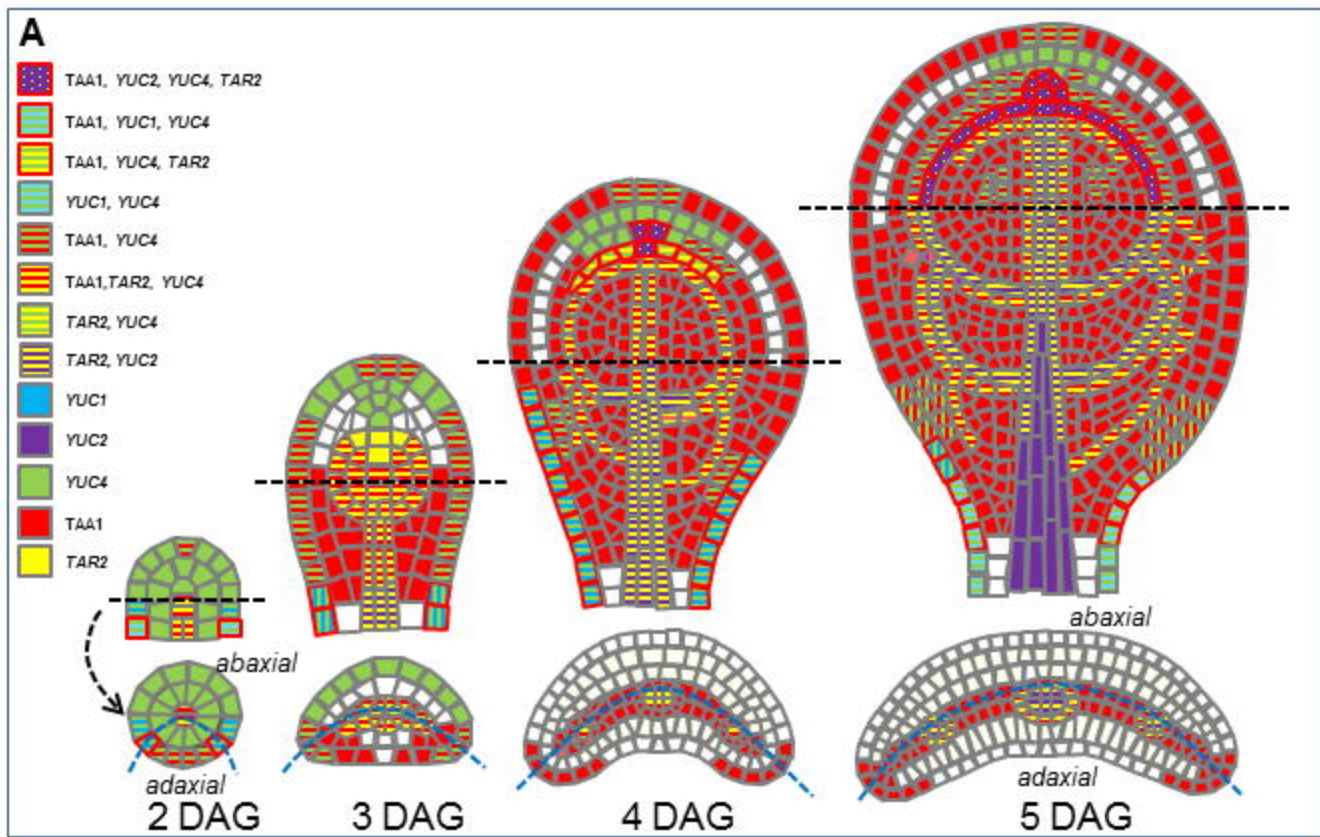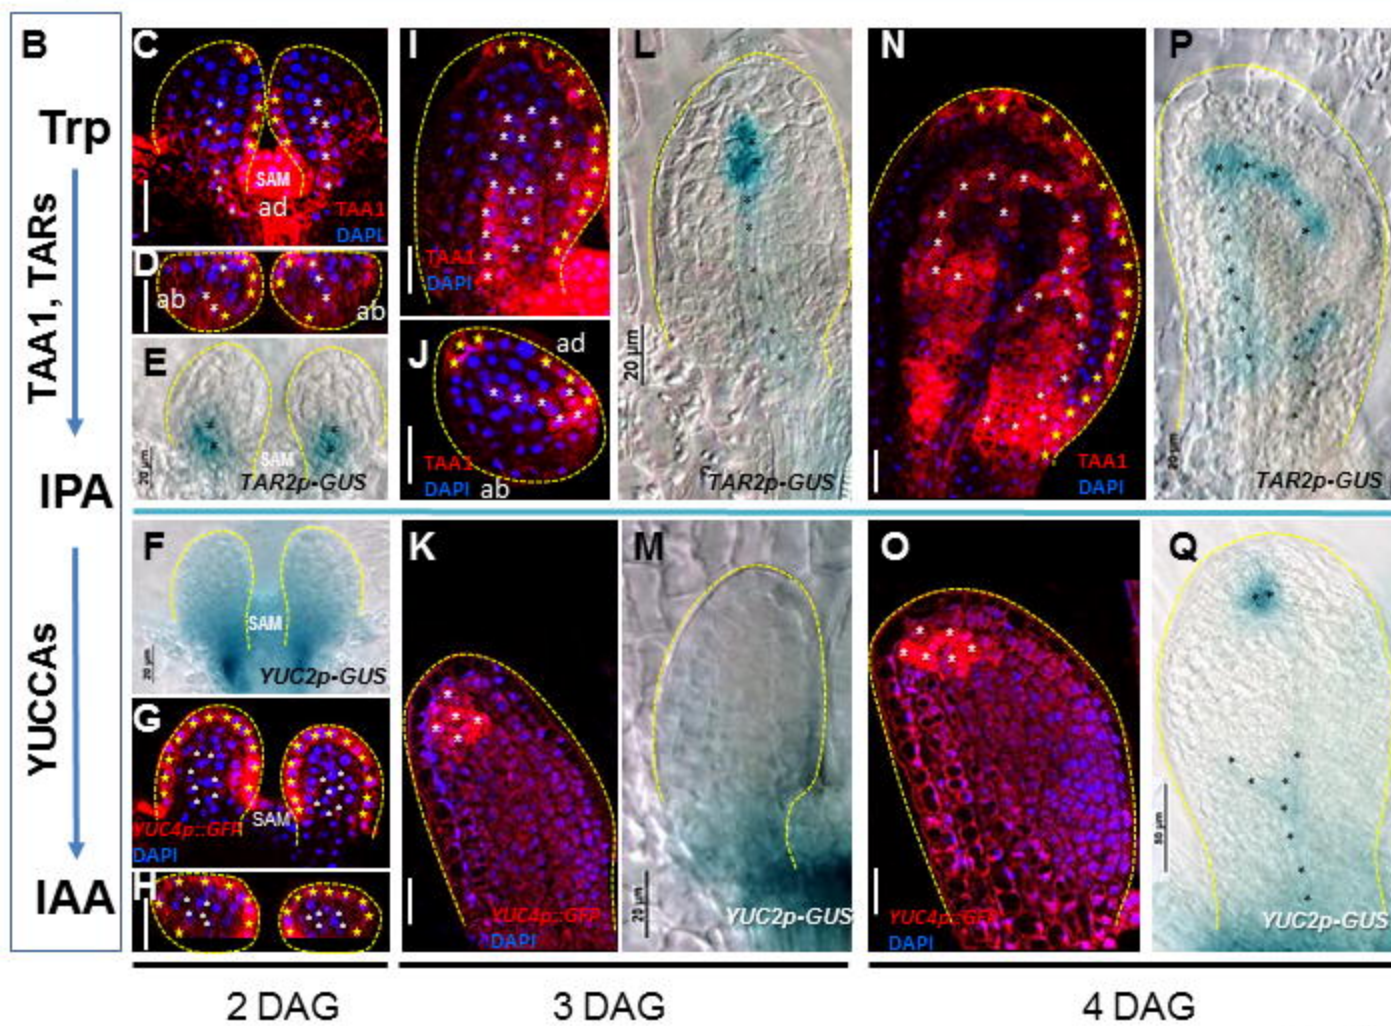

Fig. 2



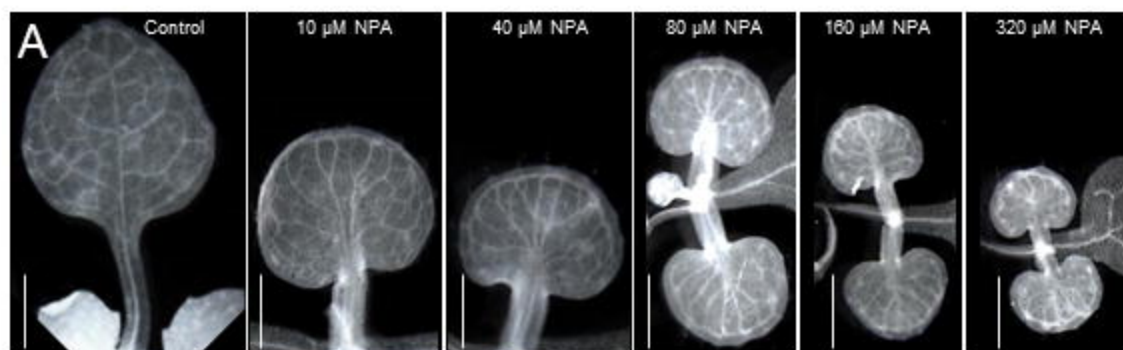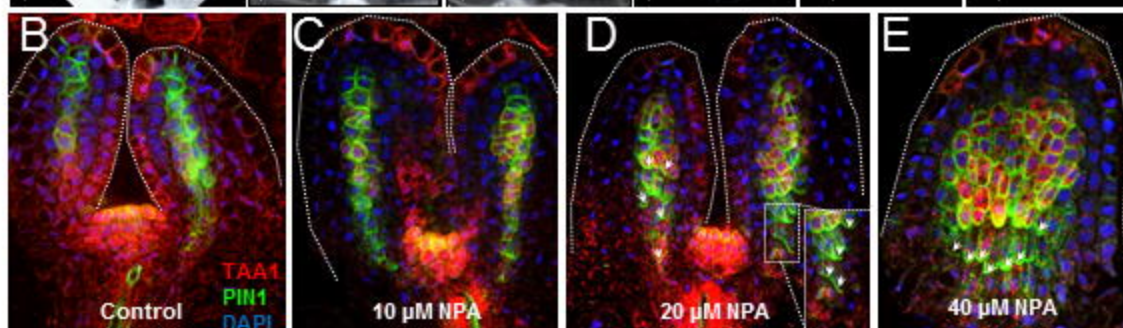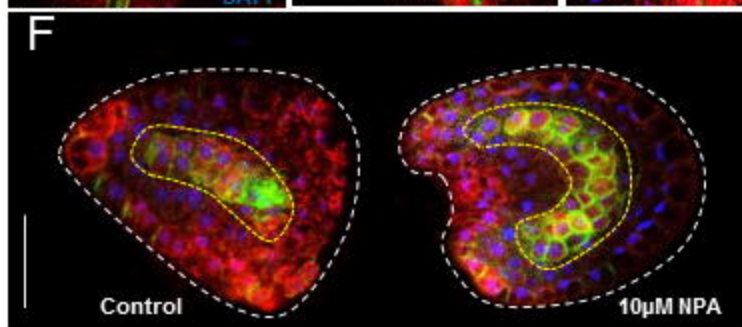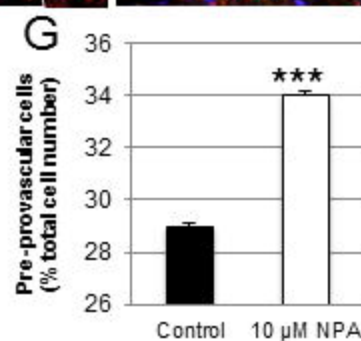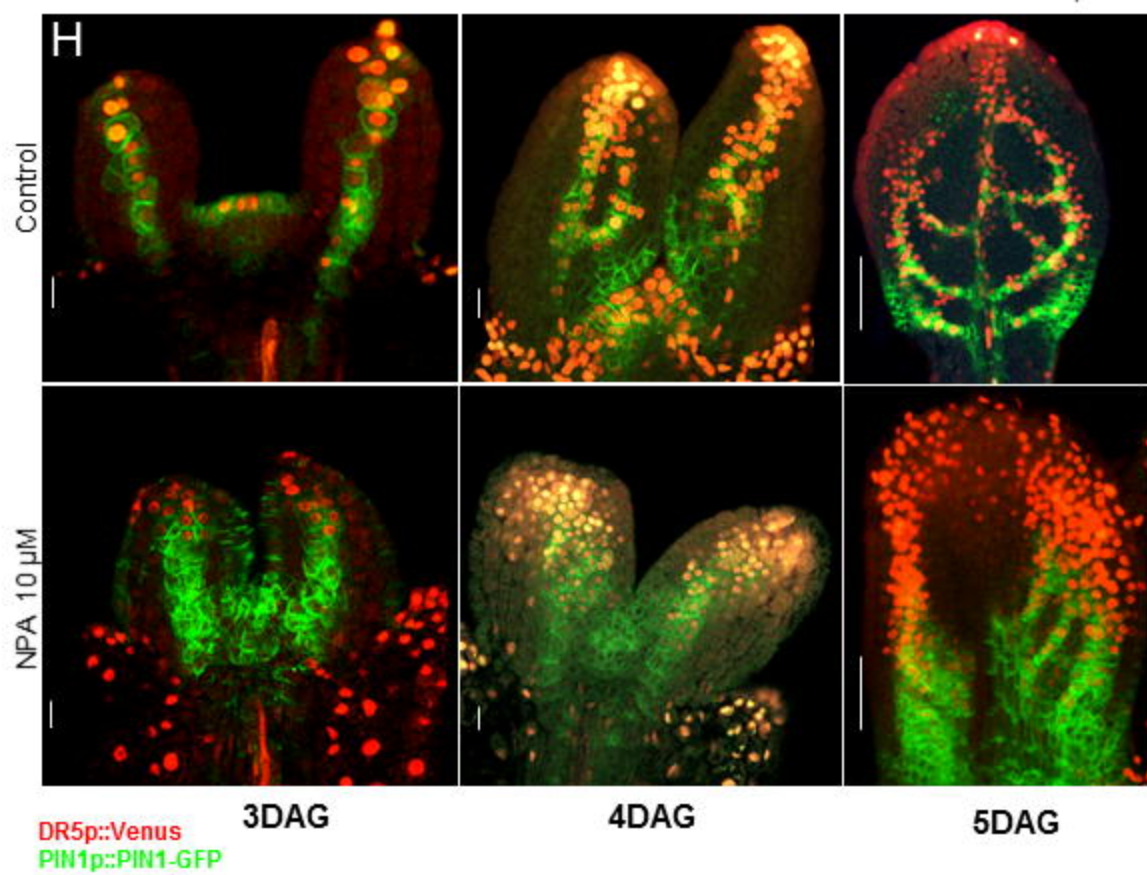

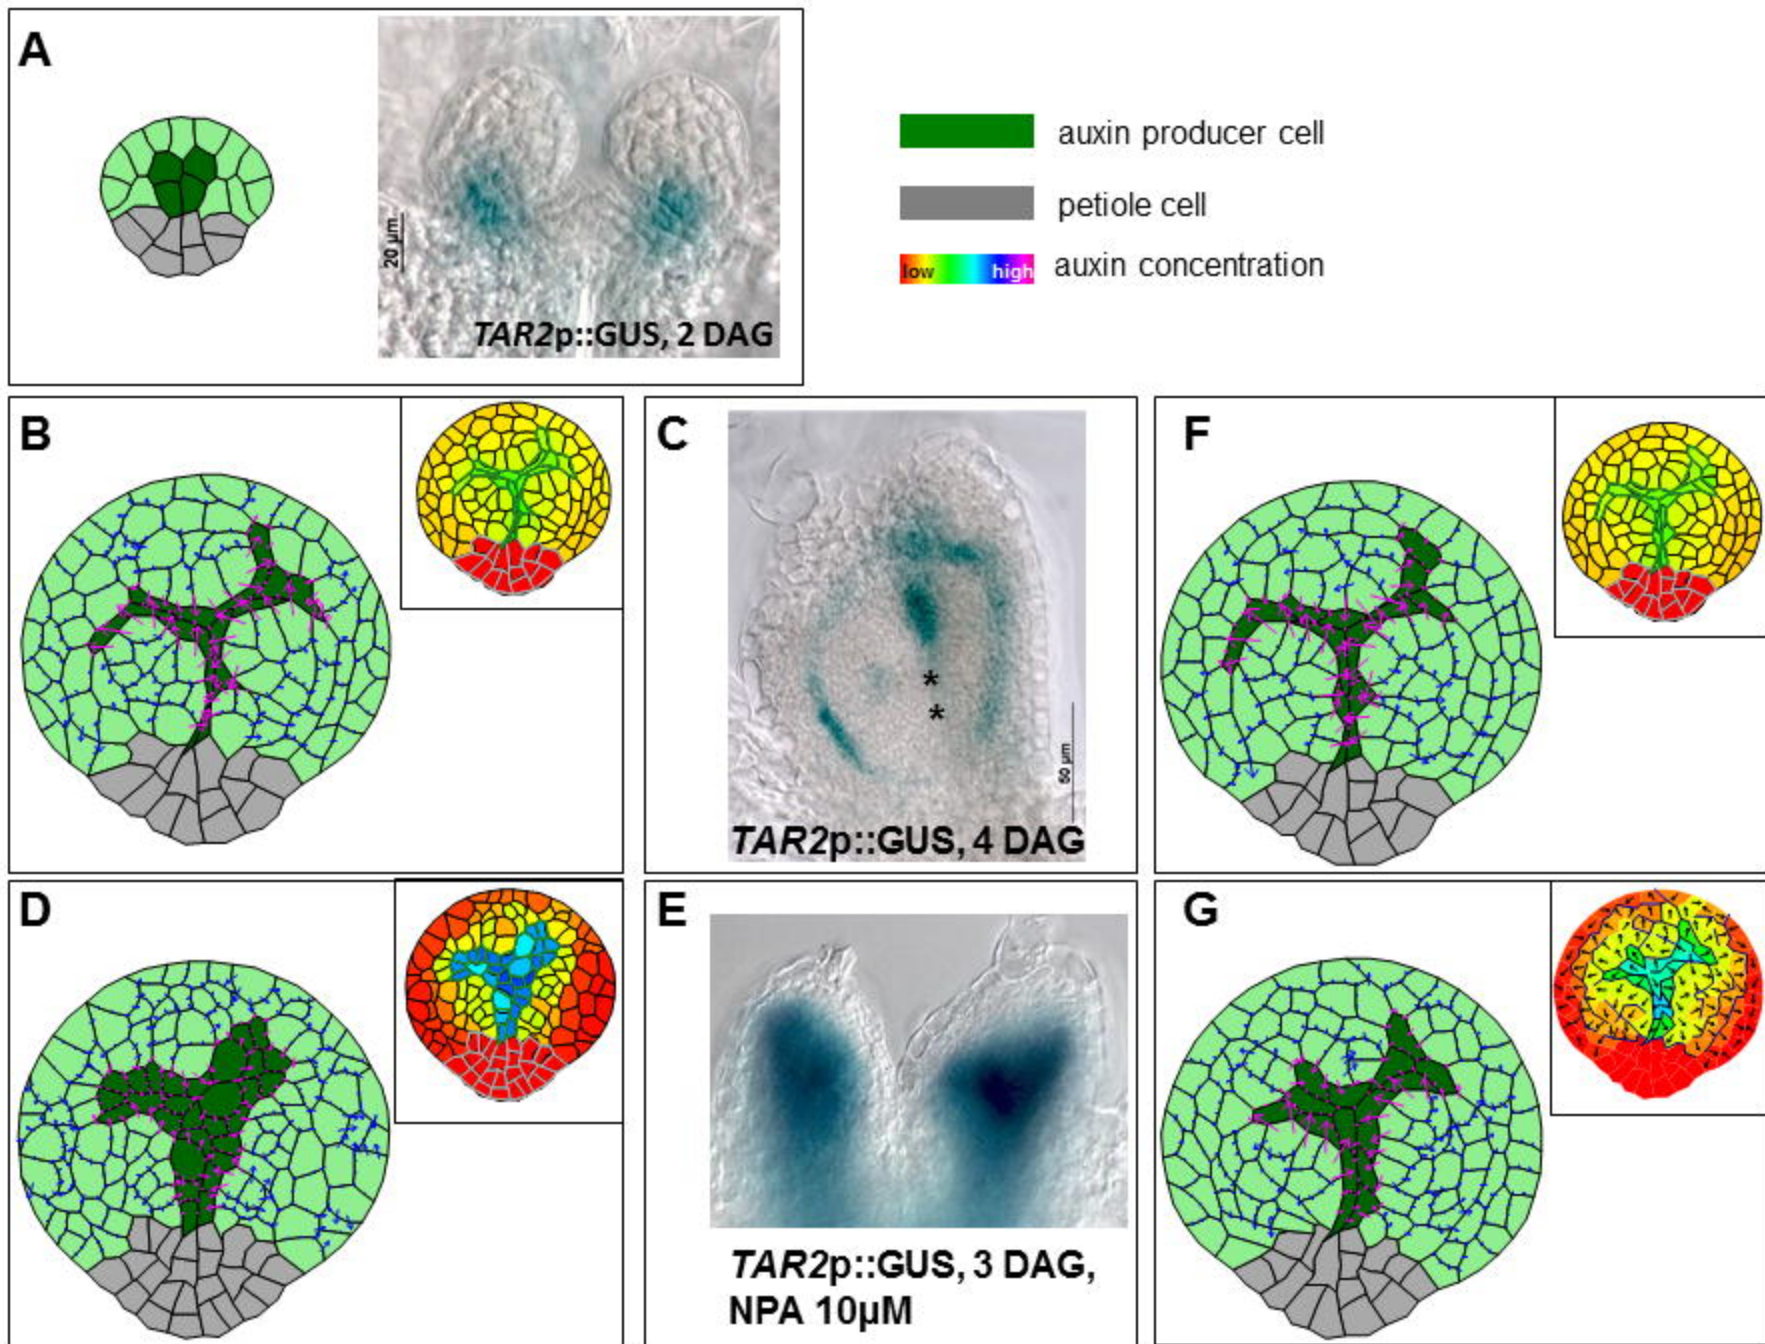

**Fig. 4**

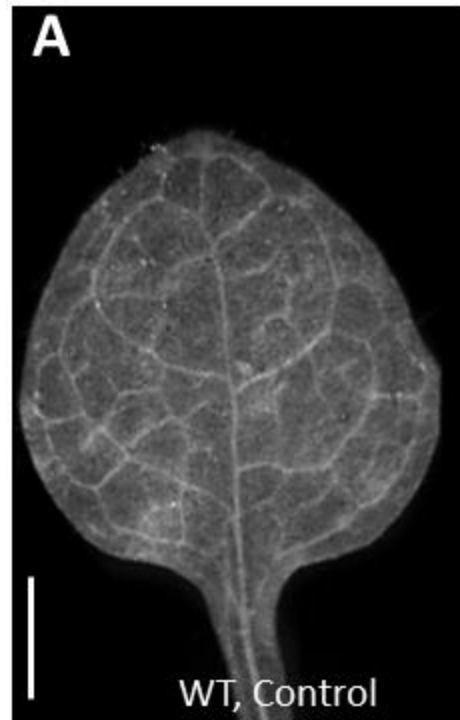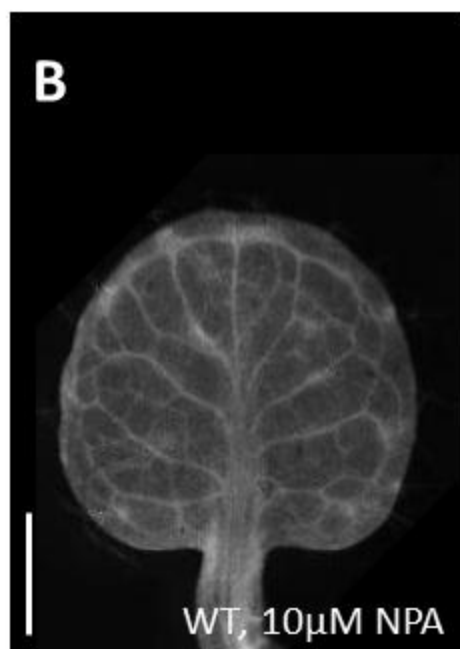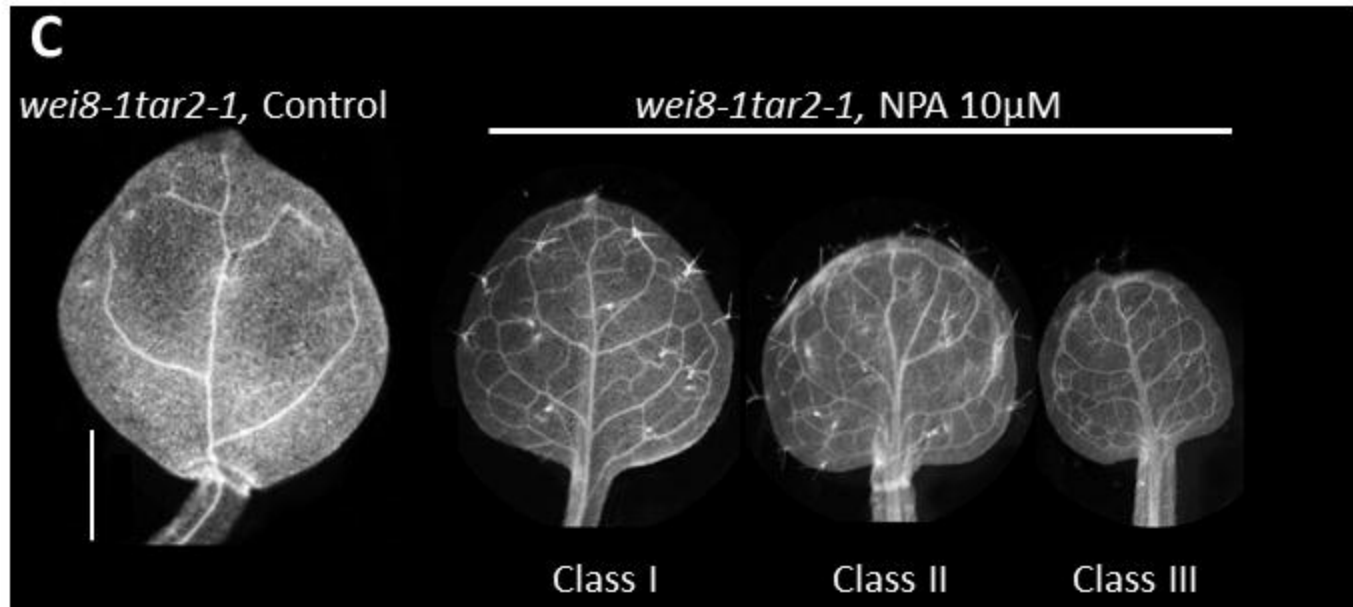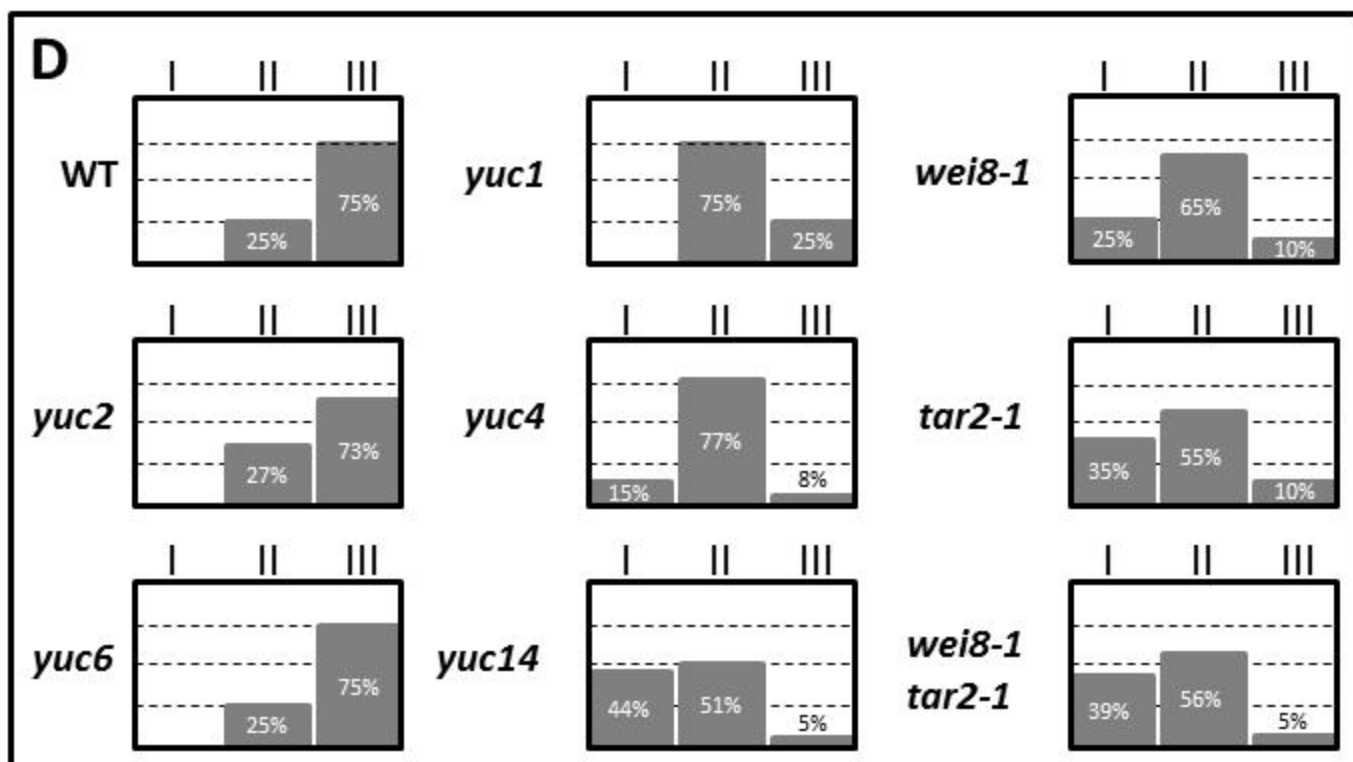

Fig. 5

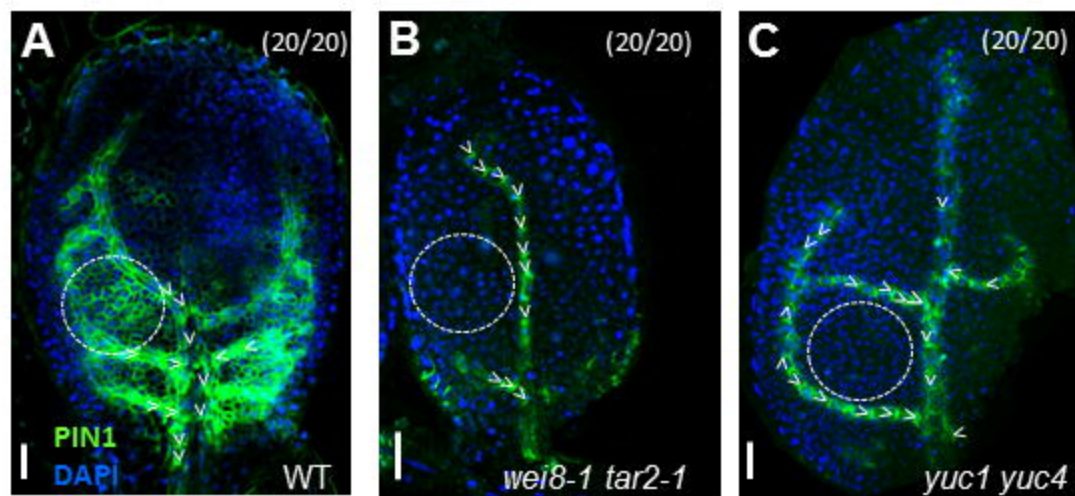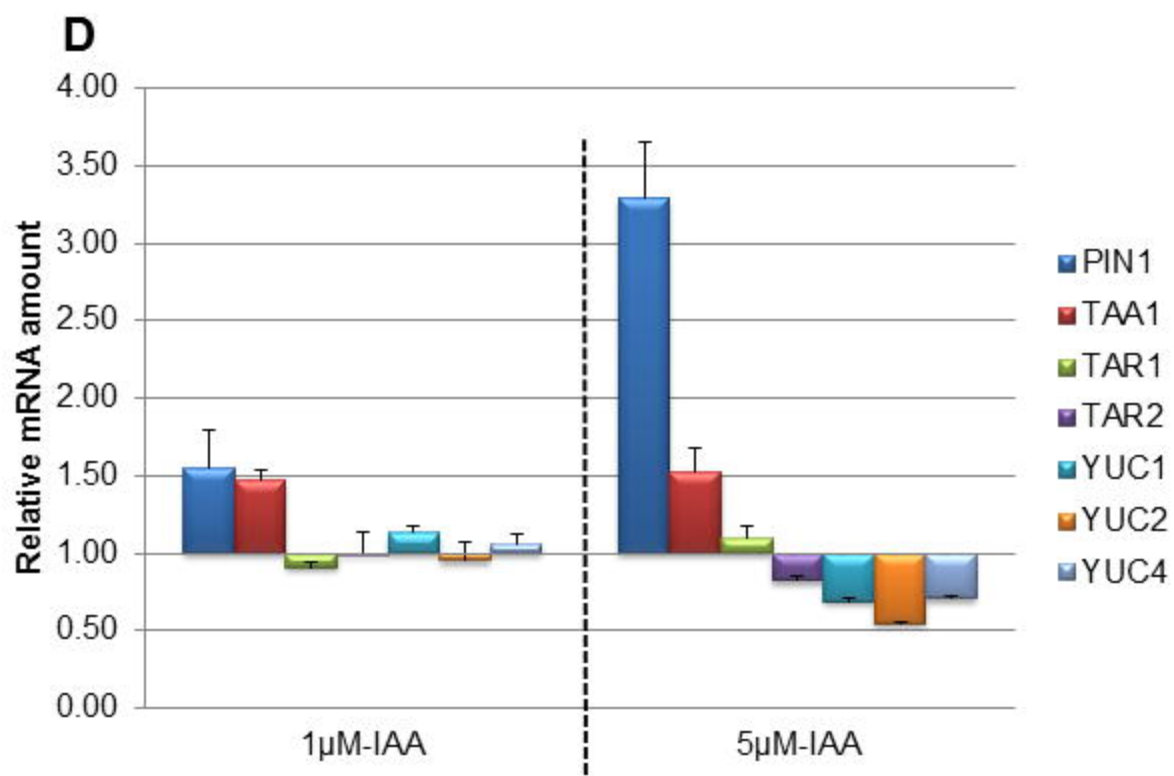

Fig. 6

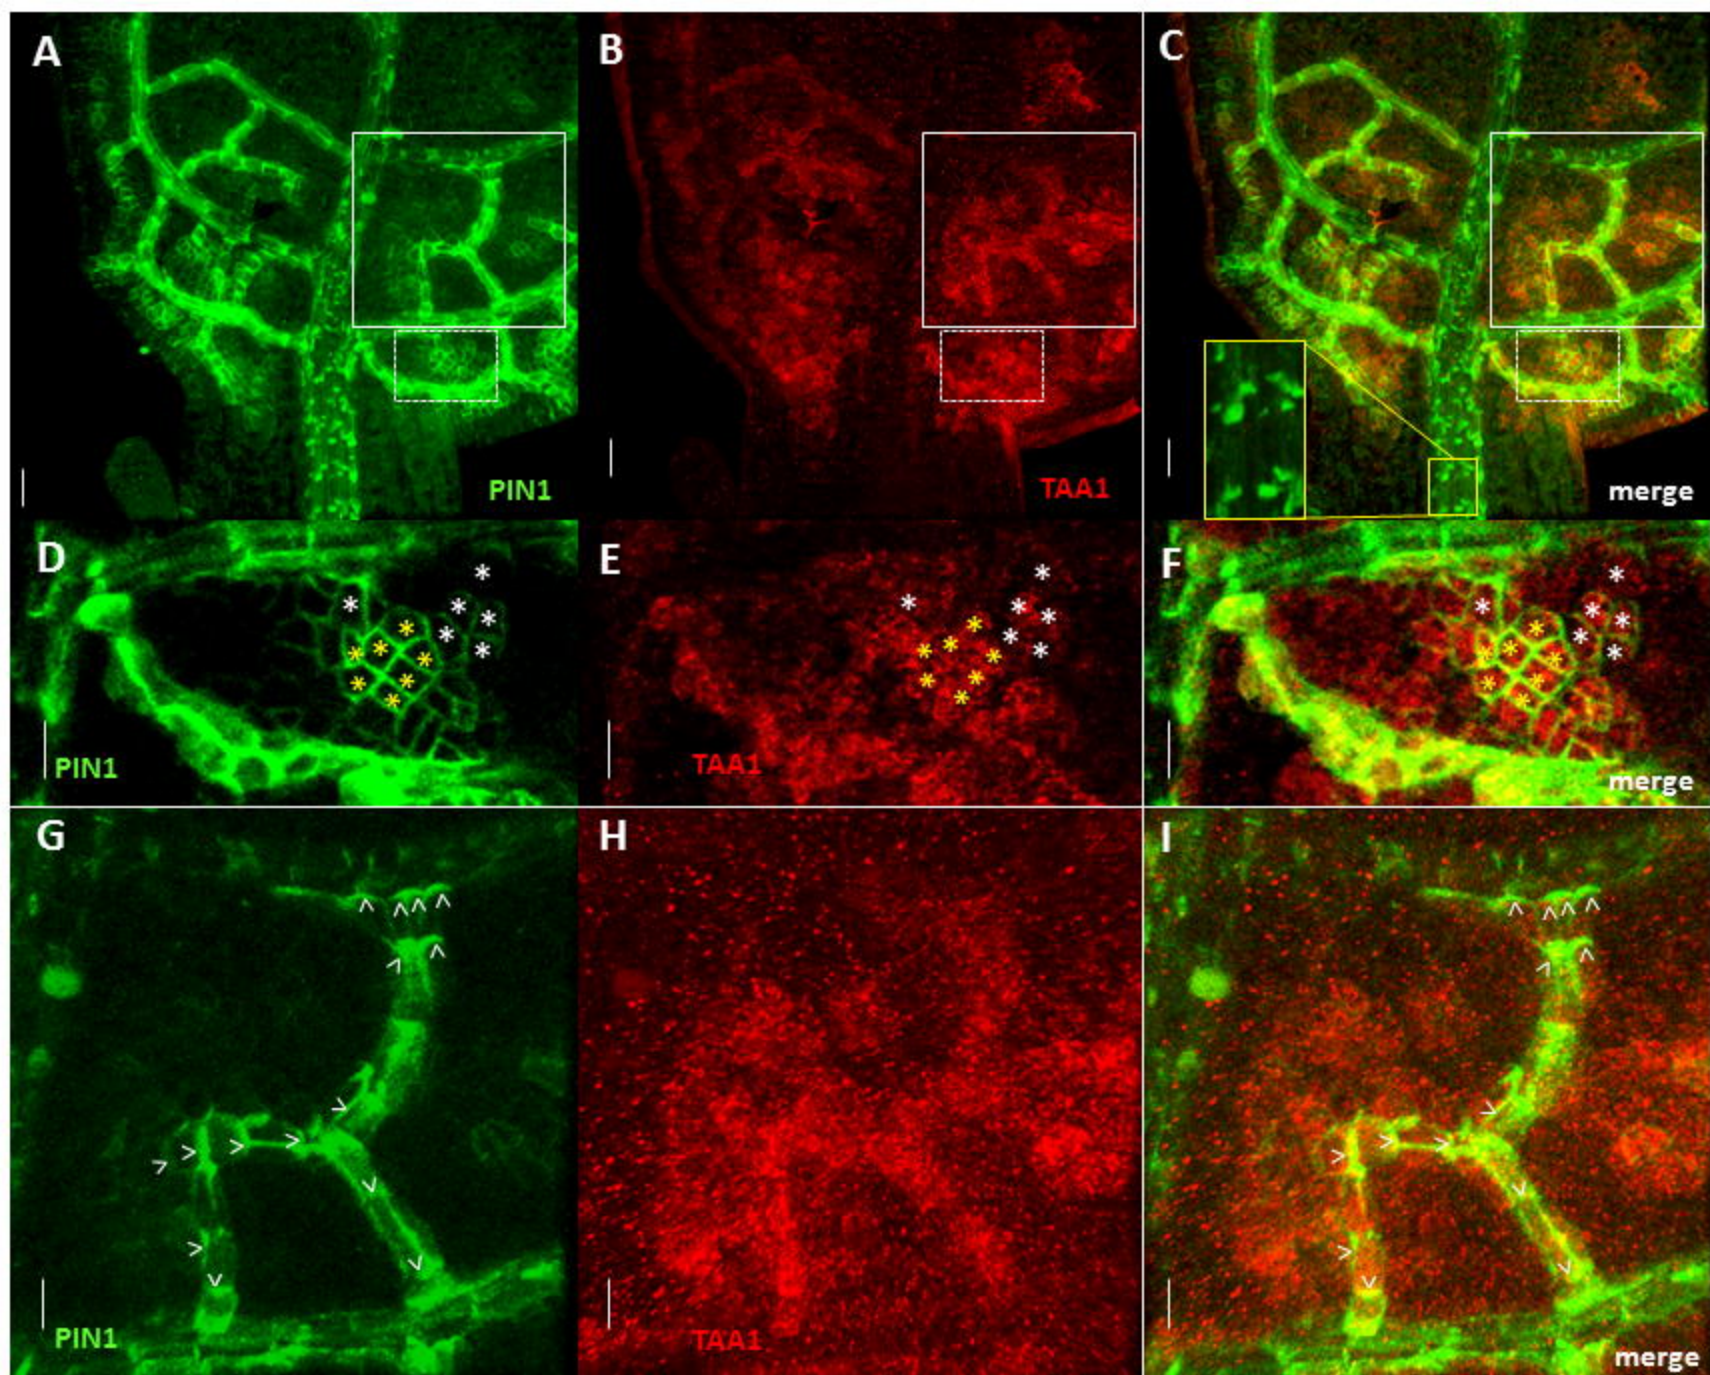

Fig. 7
